# Supplementary material for: Chiral Brønsted acid catalyzed enantioselective allenylation of aldehydes
Source: Royal Society of Chemistry journal article supplement (doi:10.1039/c2cc34371a), 2012-01-01

# Chiral Brønsted Acid Catalyzed Enantioselective Allenylation of Aldehydes

Leleti Rajender Reddy,\*

*Chemical and Analytical Development, Novartis Pharmaceutical Corporation, East Hanover,  
New Jersey 07936, USA*

**General Information.** All the reactions were performed under nitrogen gas in glassware's (screw-cap test tubes) that was flame-dried and equipped with a magnetic stirring bar. Thin-layer chromatography (TLC) was performed using silica gel 60 F254 pre-coated plates (0.25 mm). Flash chromatography was performed using silica gel (40  $\mu$ m particle size). All compounds were judged pure by TLC analysis (single spot/ two solvent systems) using a UV lamp or PMA for detection purposes.  $^1\text{H}$  and  $^{13}\text{C}$  NMR spectra were recorded on a FT-NMR spectrometer at 500 and 125 MHz, respectively. High-resolution mass spectroscopy (HRMS) was carried out in electro spray mode. Enantiomeric excess (ee) was determined using a Waters HPLC a 996 photodiode array detector. The (*R*)-TRIP-PA (**4**) was purchased from Aldrich. All solvents were purchased from Aldrich and used without further purification. The propargyl borolane (**2**) was prepared according to literature procedures.<sup>1</sup> Unless indicated otherwise, the reaction temperatures refer to external reaction temperatures. All the compounds were known compounds and were characterized by comparing their  $^1\text{H}$  NMR and  $^{13}\text{C}$  NMR values to the reported values.

## **General procedure for the asymmetric propargylation of aldehydes (GP1):**

A screw-cap reaction tube with a stir bar was evacuated, flame-dried, and back-filled with nitrogen. To this tube was added the (*R*)-TRIP-PA catalyst **4** (5 mol %), aldehyde **1** (1.0 mmol) and cyclohexane (10.0 mL). The reaction mixture was then cooled to 0 °C followed by the addition of propargyl borolane **2** (1.2 mmol), drop wise (10 min). The mixture was stirred at this temperature 12 h. The reaction mixture was washed with saturated  $\text{NaHSO}_3$  solution (10 mL) and water (10 mL) and purified by flash chromatography using ethyl acetate and heptanes (2: 8). The pure silyl alcohol was dissolved in THF (5 mL) and was added commercially available tetrabutylammonium fluoride (2 mL, 2.0 mmol, 1.0 M solution in THF, dried over 4 Å molecular sieves for 48 h) at -78 °C. After stirring the reaction mixture for 4 h at -78 °C, it was quenched

with saturated NaCl solution (10mL) at the same temperature and the reaction mixture was allowed to room temperature. The reaction mixture was extracted with ethyl acetate (2 X 10 mL). The combined organic layers was washed with water (10 mL) and concentrated to dryness to obtain crude product. This was purified by flash chromatography using ethyl acetate and heptanes (2: 8) to obtain pure alcohol **3**.

**General procedure for the asymmetric propargylation of aldehydes (GP2):**

A screw-cap reaction tube with a stir bar was evacuated, flame-dried, and back-filled with nitrogen. To this tube was added the (*R*)-TRIP-PA catalyst **4** (5 mol %), aldehyde **1** (1.0 mmol) and cyclohexane (10.0 mL). The reaction mixture was then cooled to 0 °C followed by the addition of propargyl borolane **2** (1.2 mmol), drop wise (10 min). The mixture was stirred at this temperature 12 h. After completion of the reaction, it was diluted with THF (5 mL) and was added commercially available tetrabutylammonium fluoride (2 mL, 2.0 mmol, 1.0 M solution in THF, dried over 4 Å molecular sieves for 48 h) at -78 °C. After stirring the reaction mixture for 4 h at -78 °C, it was quenched with saturated NaCl solution (10mL) at the same temperature and the reaction mixture was allowed to room temperature. The reaction mixture was extracted with ethyl acetate (2 X 10 mL). The combined organic layers was washed with water (10 mL) and concentrated to dryness to obtain crude product. This was purified by flash chromatography using ethyl acetate and heptanes (2: 8) to obtain pure alcohol **3**.

### (*R*)-1-(4-chlorophenyl)buta-2,3-dien-1-ol (**3a**):

Following the general procedure (GP1), the reaction of aldehyde **1a** (140 mg, 1.0 mmol) with boronate **2** (285 mg, 1.2 mmol) afforded alcohol **3a** as viscous oil (170 mg, 94%) with 95% ee. Enantiomeric excess was determined by HPLC with a Chiralcel OD-H column equipped with an OD-H guard column (2% IPA in hexane, flow rate = 0.8 mL/min),  $t_{\text{major}} = 25.03$  min,  $t_{\text{minor}} = 26.40$  min.  $[\alpha]_{\text{D}}^{20} = -56.2$  (c 0.8,  $\text{CHCl}_3$ ), [literature<sup>2</sup> for *R*-enantiomer with 76% ee.  $[\alpha]_{\text{D}}^{20} = -45.2$  (c 1.0,  $\text{CHCl}_3$ )]. <sup>1</sup>H NMR (400 MHz,  $\text{CDCl}_3$ )  $\delta$  ppm 7.32 (s, 4 H), 5.39 (q,  $J=6.48$  Hz, 1 H), 5.23 (dd,  $J=4.17, 2.40$  Hz, 1 H), 4.86 - 5.00 (m, 2 H), 2.34 (s, 1 H). <sup>13</sup>C NMR (125 MHz,  $\text{CDCl}_3$ )  $\delta$  ppm 207.1, 141.2, 133.4, 128.6, 127.5, 94.9, 78.4, 71.3.

Following the general procedure (GP2), the reaction of aldehyde **1a** (141 mg, 1.0 mmol) with boronate **2** (286 mg, 1.2 mmol) afforded alcohol **3a** as viscous oil (160 mg, 88%) with 95% ee.

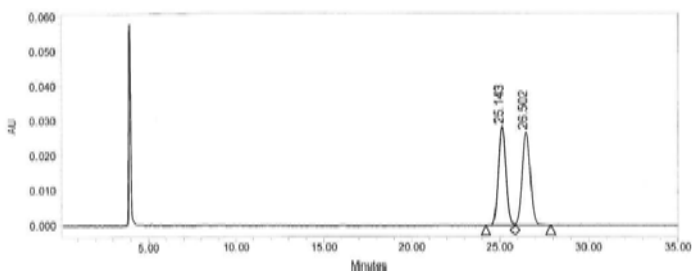

Peak Results

| Name | RT     | Area   | Height | % Area |
|------|--------|--------|--------|--------|
| 1    | 25.143 | 854181 | 26388  | 49.07  |
| 2    | 26.502 | 859597 | 26683  | 50.13  |

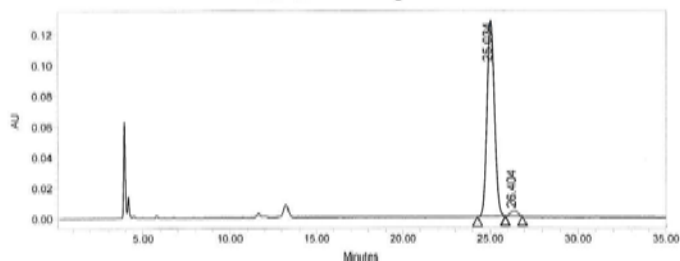

Peak Results

| Name | RT     | Area    | Height | % Area |
|------|--------|---------|--------|--------|
| 1    | 25.034 | 3808103 | 127432 | 97.30  |
| 2    | 26.404 | 105653  | 3842   | 2.70   |

**(R)-1-(4-bromophenyl)buta-2,3-dien-1-ol (3b):**

Following the general procedure (GP1), the reaction of aldehyde **1b** (185 mg, 1.0 mmol) with boronate **2** (285 mg, 1.2 mmol) afforded alcohol **3b** as viscous oil (200 mg, 90%) with 95% ee. Enantiomeric excess was determined by HPLC with a Chiralcel OD-H column equipped with an OD-H guard column (2% IPA in hexane, flow rate = 0.8 mL/min),  $t_{\text{major}} = 20.88$  min,  $t_{\text{minor}} = 23.35$  min.  $[\alpha]_{\text{D}}^{20} = -52.2$  (c 1.1,  $\text{CHCl}_3$ ).  $^1\text{H}$  NMR (400 MHz,  $\text{CDCl}_3$ )  $\delta$  ppm 7.26 - 7.37 (m, 2 H), 7.11 (d,  $J=8.34$  Hz, 2 H), 5.23 (q,  $J=6.57$  Hz, 1 H), 5.01 - 5.09 (m, 1 H), 4.68 - 4.84 (m, 2 H), 2.30 (br. s., 1 H).  $^{13}\text{C}$  NMR (125 MHz,  $\text{CDCl}_3$ )  $\delta$  ppm 206.9, 141.5, 131.2, 127.6, 121.3, 94.6, 78.2, 71.1.

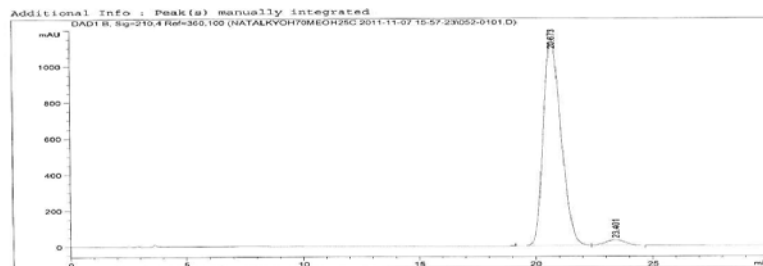

| Peak # | RetTime [min] | Type | Width [min] | Area [mAU*s] | Height [mAU] | Area %  |
|--------|---------------|------|-------------|--------------|--------------|---------|
| 1      | 20.673        | BB   | 0.8287      | 6.02536e4    | 1141.66907   | 97.2409 |
| 2      | 23.401        | BB   | 0.8942      | 1709.63220   | 30.48991     | 2.7591  |

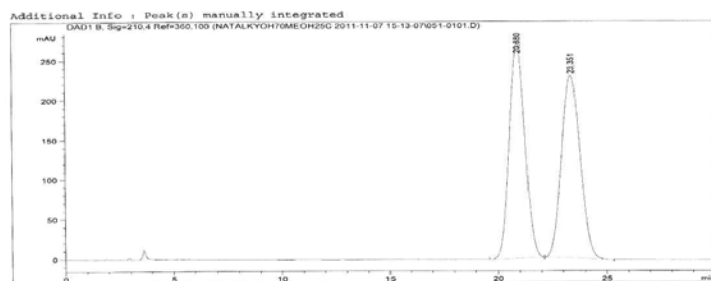

| Peak # | RetTime [min] | Type | Width [min] | Area [mAU*s] | Height [mAU] | Area %  |
|--------|---------------|------|-------------|--------------|--------------|---------|
| 1      | 20.880        | BB   | 0.7823      | 1.34776e4    | 270.03278    | 50.0167 |
| 2      | 23.351        | BB   | 0.9235      | 1.34686e4    | 229.90001    | 49.9833 |

### (*R*)-1-phenylbuta-2,3-dien-1-ol (**3c**):

Following the general procedure (GP1), the reaction of aldehyde **1c** (108 mg, 1.0 mmol) with boronate **2** (285 mg, 1.2 mmol) afforded alcohol **3c** as viscous oil (132 mg, 93%) with 91% ee. Enantiomeric excess was determined by HPLC with a Chiralcel OJ-H column equipped with an OJ-H guard column (3% IPA in hexane, flow rate = 0.8 mL/min),  $t_{\text{major}} = 34.22$  min,  $t_{\text{minor}} = 46.19$  min.  $[\alpha]_{\text{D}}^{20} = -33.2$  (c 1.0,  $\text{CHCl}_3$ ). [literature<sup>3</sup> for *R*-enantiomer with 99% ee.  $[\alpha]_{\text{D}}^{20} = -34.1$  (c 1.2,  $\text{CHCl}_3$ )]. <sup>1</sup>H NMR (400 MHz,  $\text{CDCl}_3$ )  $\delta$  ppm 7.15 - 7.45 (m, 5 H), 5.44 (q,  $J=6.57$  Hz, 1 H), 5.26 (d,  $J=6.32$  Hz, 1 H), 4.83 - 5.01 (m, 2 H), 2.25 (s, 1 H). <sup>13</sup>C NMR (125 MHz,  $\text{CDCl}_3$ )  $\delta$  ppm 207.1, 142.8, 128.5, 127.8, 126.1, 95.2, 78.2, 72.0.

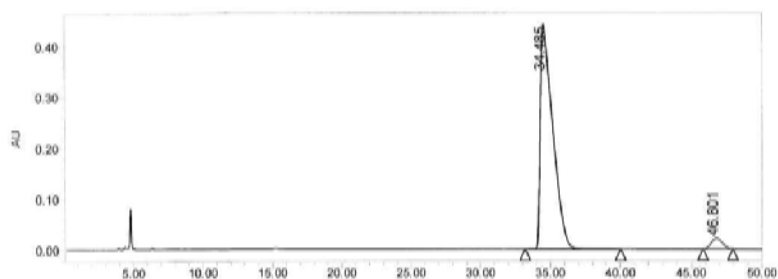

Peak Results

| Name | RT     | Area     | Height | % Area |
|------|--------|----------|--------|--------|
| 1    | 34.485 | 27341299 | 442860 | 95.87  |
| 2    | 46.801 | 1178920  | 21199  | 4.13   |

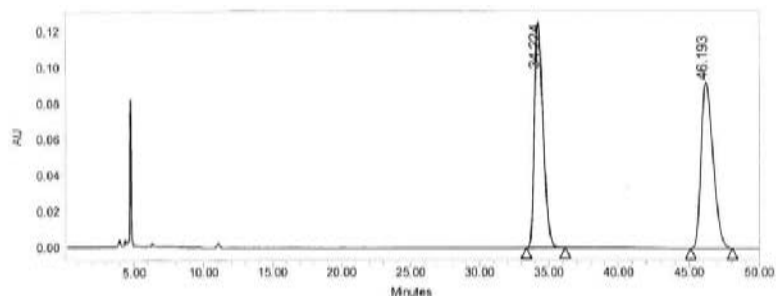

Peak Results

| Name | RT     | Area    | Height | % Area |
|------|--------|---------|--------|--------|
| 1    | 34.224 | 5436131 | 125504 | 49.97  |
| 2    | 46.193 | 5441675 | 92323  | 50.03  |

**(R)-1-(*o*-tolyl)buta-2,3-dien-1-ol (3d):**

Following the general procedure (GP1), the reaction of aldehyde **1d** (120 mg, 1.0 mmol) with boronate **2** (285 mg, 1.2 mmol) afforded alcohol **3d** as viscous oil (144 mg, 90%) with 91% ee. Enantiomeric excess was determined by HPLC with a Chiralcel OD-H column equipped with an OD-H guard column (2.5% IPA in hexane, flow rate = 0.8 mL/min),  $t_{\text{major}} = 13.42$  min,  $t_{\text{minor}} = 15.85$  min. (The silyl intermediate was isolated 202 mg, 92% yield).  $[\alpha]_{\text{D}}^{20} = -46.2$  (c 1.3,  $\text{CHCl}_3$ ).  $^1\text{H}$  NMR (400 MHz,  $\text{CDCl}_3$ )  $\delta$  7.28 - 7.39 (m, 1 H), 6.93 - 7.15 (m, 3 H), 5.31 - 5.38 (m, 1 H), 5.25 (q,  $J=6.48$  Hz, 1 H), 4.64 - 4.82 (m, 2 H), 2.21 (s, 3 H).  $^{13}\text{C}$  NMR (125 MHz,  $\text{CDCl}_3$ )  $\delta$  ppm 207.0, 140.5, 134.9, 130.2, 127.3, 126.0, 125.1, 94.1, 77.7, 68.8, 24.4, 18.8.

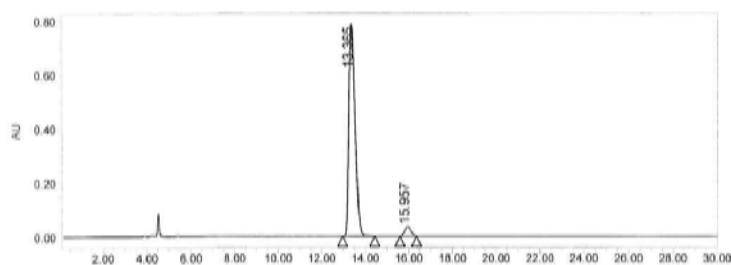

Peak Results

| Name | RT     | Area     | Height | % Area |
|------|--------|----------|--------|--------|
| 1    | 13.365 | 15488272 | 787563 | 96.58  |
| 2    | 15.957 | 718690   | 35771  | 4.42   |

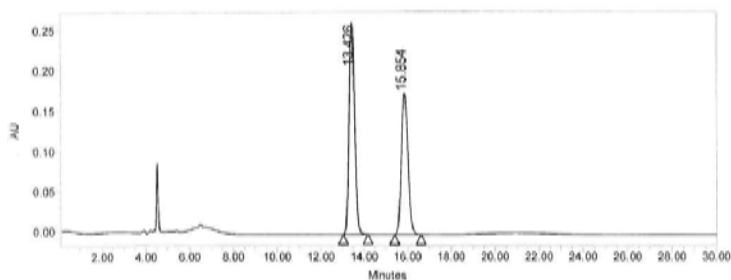

Peak Results

| Name | RT     | Area    | Height | % Area |
|------|--------|---------|--------|--------|
| 1    | 13.420 | 4655892 | 263467 | 55.78  |
| 2    | 15.854 | 3600670 | 175780 | 44.22  |

**(R)-1-(p-tolyl)buta-2,3-dien-1-ol (3e):**

Following the general procedure (GP1), the reaction of aldehyde **1e** (120 mg, 1.0 mmol) with boronate **2** (285 mg, 1.2 mmol) afforded alcohol **3e** as viscous oil (148 mg, 93%) with 91% ee. Enantiomeric excess was determined by HPLC with a Chiralcel OD-H column equipped with an OD-H guard column (5% IPA in hexane, flow rate = 0.8 mL/min),  $t_{\text{major}} = 17.34$  min,  $t_{\text{minor}} = 21.32$  min.  $[\alpha]_{\text{D}}^{20} = -52.5$  (c 0.9,  $\text{CHCl}_3$ ).  $^1\text{H}$  NMR (400 MHz,  $\text{CDCl}_3$ )  $\delta$  7.28 (d,  $J=8.08$  Hz, 2 H), 7.16 (d,  $J=7.83$  Hz, 2 H), 5.42 (q,  $J=6.57$  Hz, 1 H), 5.18 - 5.29 (m, 1 H), 4.84 - 4.98 (m, 2 H), 2.34 (s, 3 H), 2.13 (br. s., 1 H).  $^{13}\text{C}$  NMR (125 MHz,  $\text{CDCl}_3$ )  $\delta$  ppm 207.1, 139.9, 137.5, 129.2, 126.0, 95.2, 78.1, 71.8, 21.1.

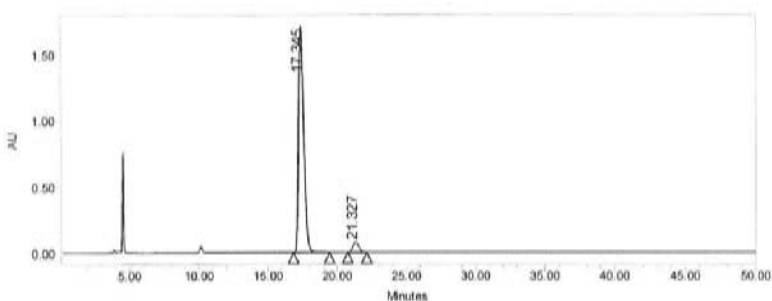

Peak Results

| Name | RT     | Area     | Height  | % Area |
|------|--------|----------|---------|--------|
| 1    | 17.345 | 45365362 | 1710374 | 95.20  |
| 2    | 21.327 | 2245944  | 76827   | 4.72   |

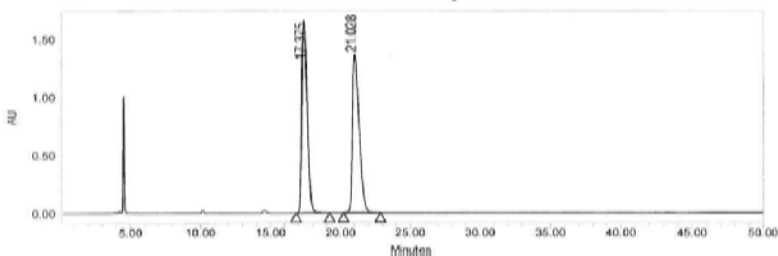

Peak Results

| Name | RT     | Area     | Height  | % Area |
|------|--------|----------|---------|--------|
| 1    | 17.375 | 44115631 | 1657882 | 49.33  |
| 2    | 21.028 | 45317201 | 1363009 | 50.67  |

**(R)-1-(p-Methoxyphenyl)buta-2,3-dien-1-ol (3f):**

Following the general procedure (GP1), the reaction of aldehyde **1f** (136 mg, 1.0 mmol) with boronate **2** (285 mg, 1.2 mmol) afforded alcohol **3f** as viscous oil (163 mg, 93%) with 90% ee. Enantiomeric excess was determined by HPLC with a Chiralcel OD-H column equipped with an OD-H guard column (2.5% IPA in hexane, flow rate = 0.8 mL/min),  $t_{\text{major}} = 18.93$  min,  $t_{\text{minor}} = 26.87$  min.  $[\alpha]_{\text{D}}^{20} = -53.1$  (c 0.8,  $\text{CHCl}_3$ ).  $^1\text{H}$  NMR (400 MHz,  $\text{CDCl}_3$ )  $\delta$  7.724 - 7.39 (m, 2 H), 6.85 - 6.96 (m, 2 H), 5.21 (t,  $J=2.91$  Hz, 1 H), 4.71 (dd,  $J=4.93, 3.16$  Hz, 2 H), 3.75 - 3.89 (m, 4 H), 1.91 (s, 1 H).  $^{13}\text{C}$  NMR (125 MHz,  $\text{CDCl}_3$ )  $\delta$  ppm 207.8, 160.4, 136.3, 129.4, 114.7, 102.6, 85.1, 74.1, 73.4, 56.4, 25.8.

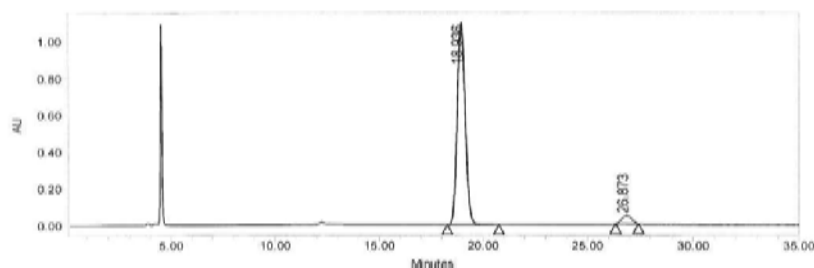

Peak Results

| Name | RT     | Area     | Height  | % Area |
|------|--------|----------|---------|--------|
| 1    | 18.935 | 29808915 | 1098263 | 95.01  |
| 2    | 26.873 | 1596343  | 46129   | 4.99   |

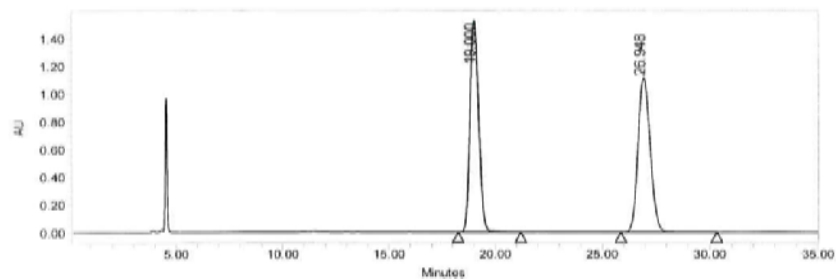

Peak Results

| Name | RT     | Area     | Height  | % Area |
|------|--------|----------|---------|--------|
| 1    | 19.000 | 43745538 | 1522072 | 49.40  |
| 2    | 26.948 | 44801759 | 1110865 | 50.60  |



**(R)-1-(thiophen-2-yl)buta-2,3-dien-1-ol (3g):**

Following the general procedure (GP1), the reaction of aldehyde **1g** (112 mg, 1.0 mmol) with boronate **2** (285 mg, 1.2 mmol) afforded alcohol **3g** as viscous oil (135 mg, 89%) with 95% ee. Enantiomeric excess was determined by HPLC with a Chiralcel OD-H column equipped with an OD-H guard column (5% IPA in hexane, flow rate = 0.8 mL/min),  $t_{\text{major}} = 11.93$  min,  $t_{\text{minor}} = 14.34$  min.  $[\alpha]_{\text{D}}^{20} = -42.3$  (c 1.2,  $\text{CHCl}_3$ ).  $^1\text{H}$  NMR (400 MHz,  $\text{CDCl}_3$ )  $\delta$  7.10 - 7.18 (m, 1 H), 6.77 - 6.95 (m, 2 H), 5.26 - 5.50 (m, 2 H), 4.70 - 4.94 (m, 2 H), 2.27 (d,  $J=3.79$  Hz, 1 H).  $^{13}\text{C}$  NMR (125 MHz,  $\text{CDCl}_3$ )  $\delta$  ppm 207.1, 146.9, 126.7, 125.2, 124.3, 94.8, 78.8, 68.0.

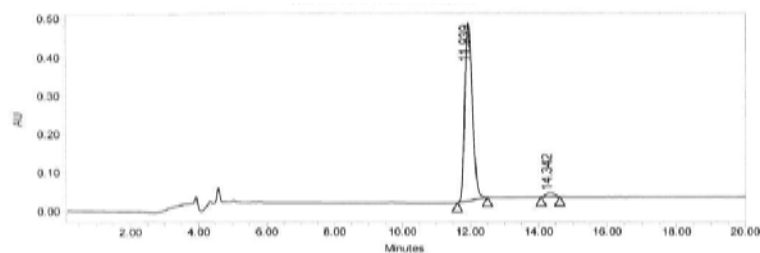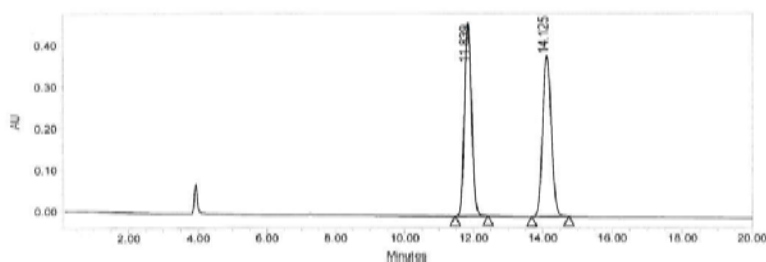

Peak Results

| Name | RT     | Area    | Height | % Area |
|------|--------|---------|--------|--------|
| 1    | 11.839 | 6644911 | 460049 | 49.94  |
| 2    | 14.125 | 6660333 | 387169 | 50.06  |

### (*S,E*)-1-phenylhexa-1,4,5-trien-3-ol (**3h**):<sup>4</sup>

Following the general procedure (GP1), the reaction of aldehyde **1h** (132 mg, 1.0 mmol) with boronate **2** (285 mg, 1.2 mmol) afforded alcohol **3h** as viscous oil (158 mg, 92%) with 82% ee. Enantiomeric excess was determined by HPLC with a Chiralcel OD-H column equipped with an OD-H guard column (5% IPA in hexane, flow rate = 0.8 mL/min),  $t_{\text{major}} = 20.13$  min,  $t_{\text{minor}} = 30.79$  min.  $[\alpha]_{\text{D}}^{20} = +51.5$  (c 0.6,  $\text{CHCl}_3$ ).  $^1\text{H NMR}$  (400 MHz,  $\text{CDCl}_3$ )  $\delta$  7.35 - 7.42 (m, 2 H), 7.27 - 7.35 (m, 2 H), 7.19 - 7.27 (m, 1 H), 6.63 (d,  $J=15.66$  Hz, 1 H), 6.27 (dd,  $J=15.92, 6.32$  Hz, 1 H), 5.36 (q,  $J=6.32$  Hz, 1 H), 4.92 (dd,  $J=6.57, 2.53$  Hz, 2 H), 4.80 - 4.89 (m, 1 H), 2.13 (br. s., 1 H).  $^{13}\text{C NMR}$  (125 MHz,  $\text{CDCl}_3$ )  $\delta$  ppm 207.3, 136.5, 130.7, 130.4, 128.6, 127.8, 126.6, 98.8, 78.2, 70.4.

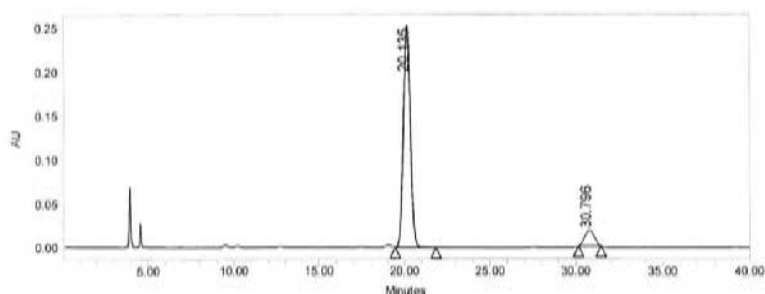

Peak Results

| Name | RT     | Area    | Height | % Area |
|------|--------|---------|--------|--------|
| 1    | 20.135 | 7112260 | 252763 | 91.07  |
| 2    | 30.796 | 697059  | 17494  | 8.93   |

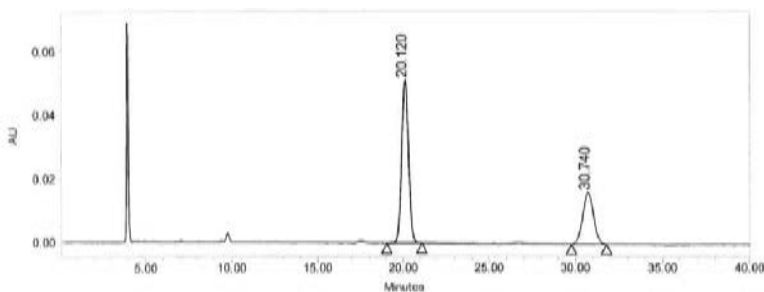

Peak Results

| Name | RT     | Area    | Height | % Area |
|------|--------|---------|--------|--------|
| 1    | 20.120 | 1440060 | 51204  | 66.67  |
| 2    | 30.740 | 720054  | 16277  | 33.33  |

### (S)-1-phenylhexa-4,5-dien-3-ol (**3i**):

Following the general procedure (GP1), the reaction of aldehyde **1i** (134 mg, 1.0 mmol) with boronate **2** (285 mg, 1.2 mmol) afforded alcohol **3i** as viscous oil (156 mg, 90%) with 96% ee. Enantiomeric excess was determined by HPLC with a Chiralcel OD-H column equipped with an OD-H guard column (8% IPA in hexane, flow rate = 0.8 mL/min),  $t_{\text{major}} = 12.24$  min,  $t_{\text{minor}} = 14.29$  min.  $[\alpha]_{\text{D}}^{20} = +14.3$  (c 1.1,  $\text{CHCl}_3$ ). [literature<sup>4</sup> for *S*-enantiomer with 88% ee.  $[\alpha]_{\text{D}}^{20} = +11.8$  (c 1.0,  $\text{CHCl}_3$ )]. <sup>1</sup>H NMR (400 MHz,  $\text{CDCl}_3$ )  $\delta$  7.09 - 7.37 (m, 5 H), 5.28 (q,  $J=6.57$  Hz, 1 H), 4.88 (dd,  $J=6.69, 2.40$  Hz, 2 H), 4.12 - 4.25 (m, 1 H), 2.61 - 2.86 (m, 2 H), 1.82 - 2.00 (m, 2 H), 1.71 (br. s., 1 H). <sup>13</sup>C NMR (125 MHz,  $\text{CDCl}_3$ )  $\delta$  ppm 207.0, 141.8, 128.4, 125.8, 94.7, 77.8, 68.9, 39.0, 31.7.

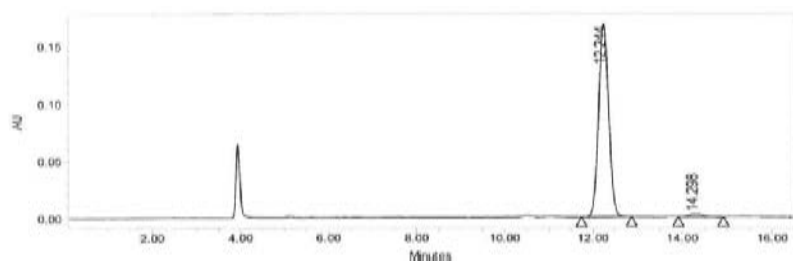

Peak Results

| Name | RT     | Area    | Height | % Area |
|------|--------|---------|--------|--------|
| 1    | 12.244 | 2674481 | 167712 | 97.82  |
| 2    | 14.298 | 59577   | 3030   | 2.18   |

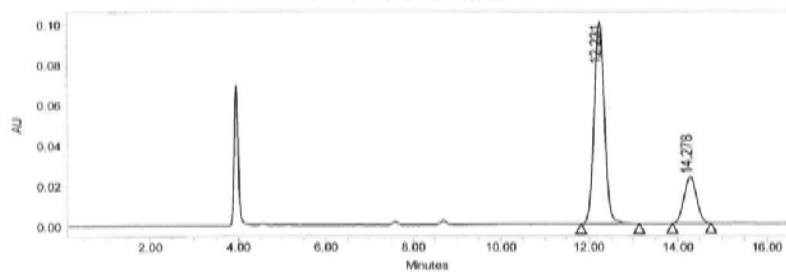

Peak Results

| Name | RT     | Area    | Height | % Area |
|------|--------|---------|--------|--------|
| 1    | 12.231 | 1614107 | 100039 | 78.20  |
| 2    | 14.278 | 450009  | 23163  | 21.80  |

**(S)-1-cyclohexylbuta-2,3-dien-1-ol (3j):**

Following the general procedure (GP1), the reaction of aldehyde **1j** (112 mg, 1.0 mmol) with boronate **2** (285 mg, 1.2 mmol) afforded alcohol **3j** as viscous oil (142 mg, 94%) with 99% ee. Enantiomeric excess was determined by HPLC with a Chiralcel OJ-H column equipped with an OJ-H guard column (1% IPA in hexane, flow rate = 0.8 mL/min),  $t_{\text{major}} = 15.71$  min,  $t_{\text{minor}} = 13.59$  min.  $[\alpha]_{\text{D}}^{20} = +16.8$  (c 1.0, Benzene). [literature<sup>4</sup> for S-enantiomer with 90% ee.  $[\alpha]_{\text{D}}^{20} = +14.2$  (c 1.1, Benzene)]. <sup>1</sup>H NMR (400 MHz, *CDCl*<sub>3</sub>) δ 5.09 (q, *J*=6.57 Hz, 1 H), 4.71 (dd, *J*=6.57, 2.27 Hz, 2 H), 3.72 - 3.86 (m, 1 H), 1.46 - 1.79 (m, 6 H), 1.23 - 1.40 (m, 1 H), 0.77 - 1.23 (m, 5 H). <sup>13</sup>C NMR (125 MHz, *CDCl*<sub>3</sub>) δ ppm 207.0, 93.0, 73.8, 43.9, 28.4, 28.0, 26.2, 25.8, 25.8, 24.4.

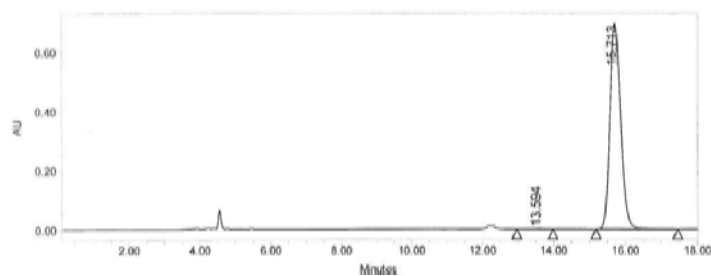

Peak Results

| Name | RT     | Area     | Height | % Area |
|------|--------|----------|--------|--------|
| 1    | 13.594 | 24886    | 1143   | 0.17   |
| 2    | 15.713 | 14271321 | 695433 | 99.83  |

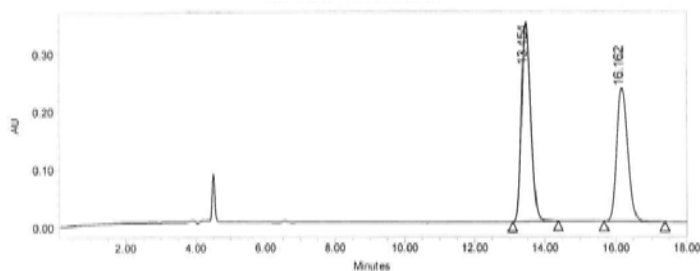

---

<sup>1</sup> R. W. Hoffmann, H. Brinkmann, G. Frenking, *Chemische Berichte* **1990**, *123*, 2387.

<sup>2</sup> Y. Wang, K. Zheng, R. Hong. *J. Am. Chem. Soc.* **2012**, *134*, 4096.

<sup>3</sup> M. Yoshida, Y. Shoji, K. Shishido. *Tetrahedron* **2010**, *66*, 5053.

<sup>3</sup> E. J. Corey, M. L. Chan, H. Duck. *J. Am. Chem. Soc.* **1990**, *112*, 878.

<sup>4</sup> G. Xia, H. Yamamoto. *J. Am. Chem. Soc.* **2007**, *129*, 496.

5/16/2012 3:54:14 PM

| Acquisition Time (sec) | 3.9584                                                                           | Comment                | Chloro-allenyl-p | Date                 | 18 Apr 2012 23:10:56 |
|------------------------|----------------------------------------------------------------------------------|------------------------|------------------|----------------------|----------------------|
| Date Stamp             | 18 Apr 2012 23:10:56                                                             |                        |                  |                      |                      |
| File Name              | C:\Documents and Settings\leletra1\Desktop\paper12\NMRs\Chloro-allenyl-p_010001r |                        |                  |                      |                      |
| Nucleus                | <sup>1</sup> H                                                                   | Number of Transients   | 16               | Origin               | spect                |
| Owner                  | nmsu                                                                             | Points Count           | 32768            | Pulse Sequence       | zg30                 |
| SW(cyclical) (Hz)      | 8278.15                                                                          | Solvent                | CHLOROFORM-d     | Receiver Gain        | 128.00               |
| Sweep Width (Hz)       | 8277.89                                                                          | Temperature (degree C) | 27.000           | Spectrum Offset (Hz) | 2455.5339            |

<sup>1</sup>H NMR (400 MHz, CHLOROFORM-d) δ ppm 7.32 (s, 4 H), 5.39 (q, J=6.48 Hz, 1 H), 5.23 (dd, J=4.17, 2.40 Hz, 1 H), 4.86 - 5.00 (m, 2 H), 2.34 (s, 1 H)

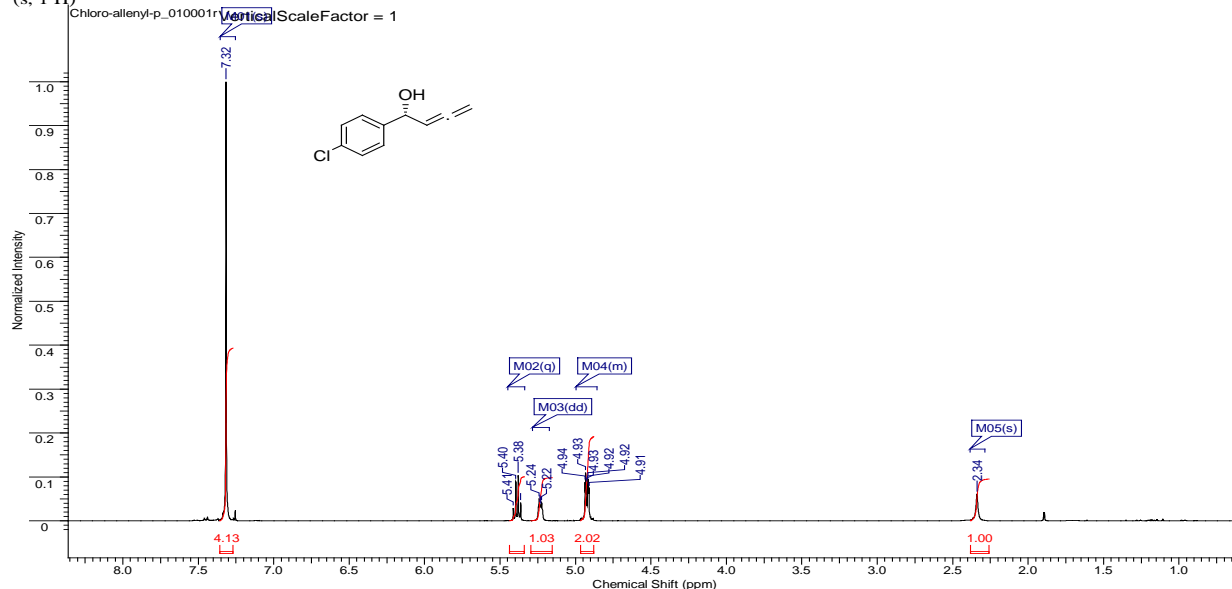

5/16/2012 3:57:46 PM

| Acquisition Time (sec) | 1.3664                                                                           | Comment                | Chloro-allenyl-p | Date                 | 19 Apr 2012 05:41:20 |
|------------------------|----------------------------------------------------------------------------------|------------------------|------------------|----------------------|----------------------|
| Date Stamp             | 19 Apr 2012 05:41:20                                                             |                        |                  |                      |                      |
| File Name              | C:\Documents and Settings\leletra1\Desktop\paper12\NMRs\Chloro-allenyl-p_013001r |                        |                  |                      |                      |
| Nucleus                | <sup>13</sup> C                                                                  | Number of Transients   | 2048             | Origin               | spect                |
| Owner                  | nmsu                                                                             | Points Count           | 32768            | Pulse Sequence       | zgpg30               |
| SW(cyclical) (Hz)      | 23980.81                                                                         | Solvent                | CHLOROFORM-d     | Receiver Gain        | 14596.50             |
| Sweep Width (Hz)       | 23980.08                                                                         | Temperature (degree C) | 27.000           | Spectrum Offset (Hz) | 10062.3271           |

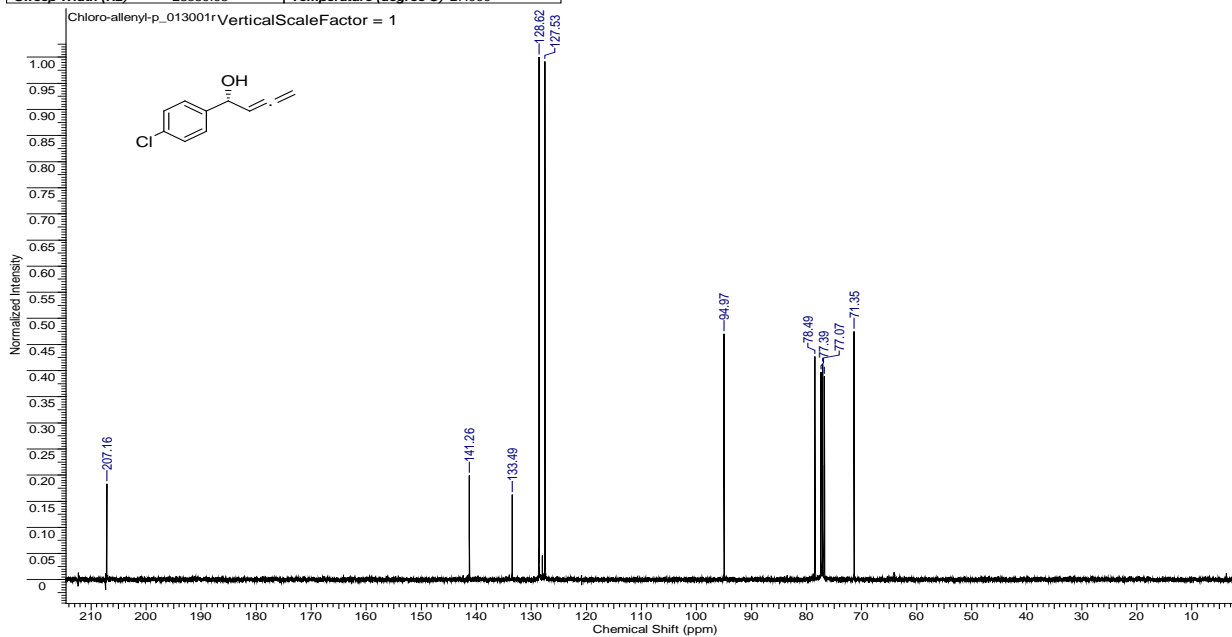

5/16/2012 4:26:29 PM

| Acquisition Time (sec) | 3.9584                                                                                  | Comment                | P-Br-all-2   | Date                 | 06 May 2012 00:00:00 |
|------------------------|-----------------------------------------------------------------------------------------|------------------------|--------------|----------------------|----------------------|
| Date Stamp             | 06 May 2012 00:00:00                                                                    |                        |              |                      |                      |
| File Name              | C:\Documents and Settings\leletra1\Desktop\Old_Desktop\paper12\NMRs\IP-Br-all-2_010001r |                        |              | Frequency (MHz)      | 400.19               |
| Nucleus                | <sup>1</sup> H                                                                          | Number of Transients   | 16           | Origin               | spect                |
| Owner                  | nmsu                                                                                    | Points Count           | 32768        | Pulse Sequence       | zg30                 |
| SW(cyclical) (Hz)      | 8278.15                                                                                 | Solvent                | CHLOROFORM-d | Receiver Gain        | 90.50                |
| Sweep Width (Hz)       | 8277.89                                                                                 | Temperature (degree C) | 27.000       | Spectrum Offset (Hz) | 2400.6772            |

<sup>1</sup>H NMR (400 MHz, CHLOROFORM-d) δ ppm 7.26 - 7.37 (m, 2 H), 7.11 (d, *J*=8.34 Hz, 2 H), 5.23 (q, *J*=6.57 Hz, 1 H), 5.01 - 5.09 (m, 1 H), 4.68 - 4.84 (m, 2 H), 2.30 (br. s., 1 H)

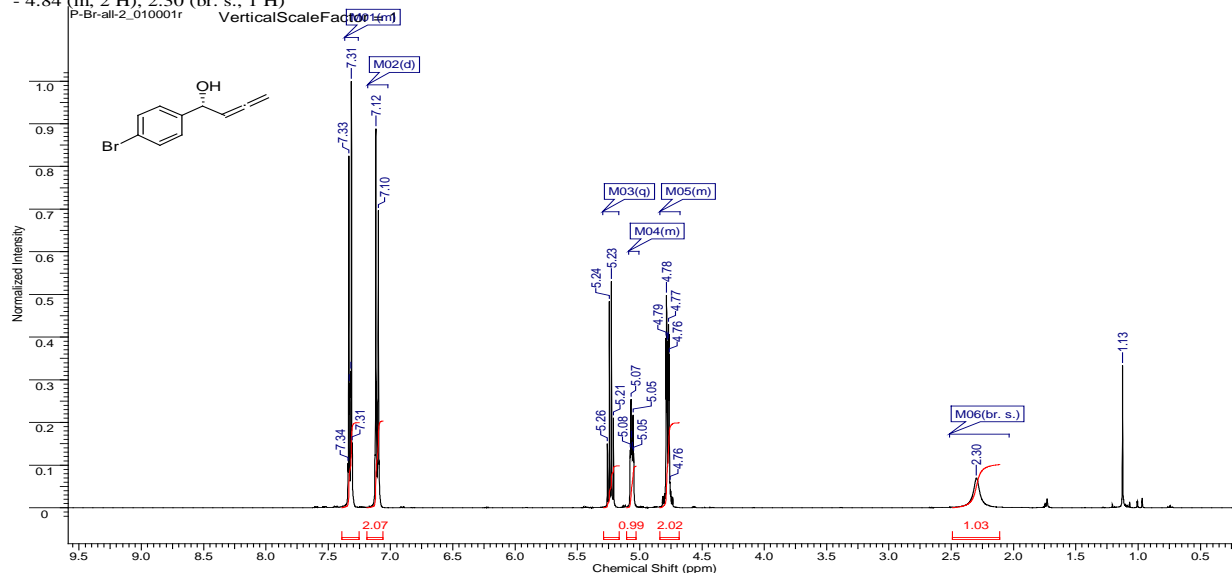

5/16/2012 4:29:03 PM

| Acquisition Time (sec) | 1.3664                                                                                  | Comment                | P-Br-all-2   | Date                 | 06 May 2012 01:16:48 |
|------------------------|-----------------------------------------------------------------------------------------|------------------------|--------------|----------------------|----------------------|
| Date Stamp             | 06 May 2012 01:16:48                                                                    |                        |              |                      |                      |
| File Name              | C:\Documents and Settings\leletra1\Desktop\Old_Desktop\paper12\NMRs\IP-Br-all-2_012001r |                        |              | Frequency (MHz)      | 100.63               |
| Nucleus                | <sup>13</sup> C                                                                         | Number of Transients   | 2048         | Origin               | spect                |
| Owner                  | nmsu                                                                                    | Points Count           | 32768        | Pulse Sequence       | zgpg30               |
| SW(cyclical) (Hz)      | 23980.81                                                                                | Solvent                | CHLOROFORM-d | Receiver Gain        | 8192.00              |
| Sweep Width (Hz)       | 23980.08                                                                                | Temperature (degree C) | 27.000       | Spectrum Offset (Hz) | 10035.1045           |

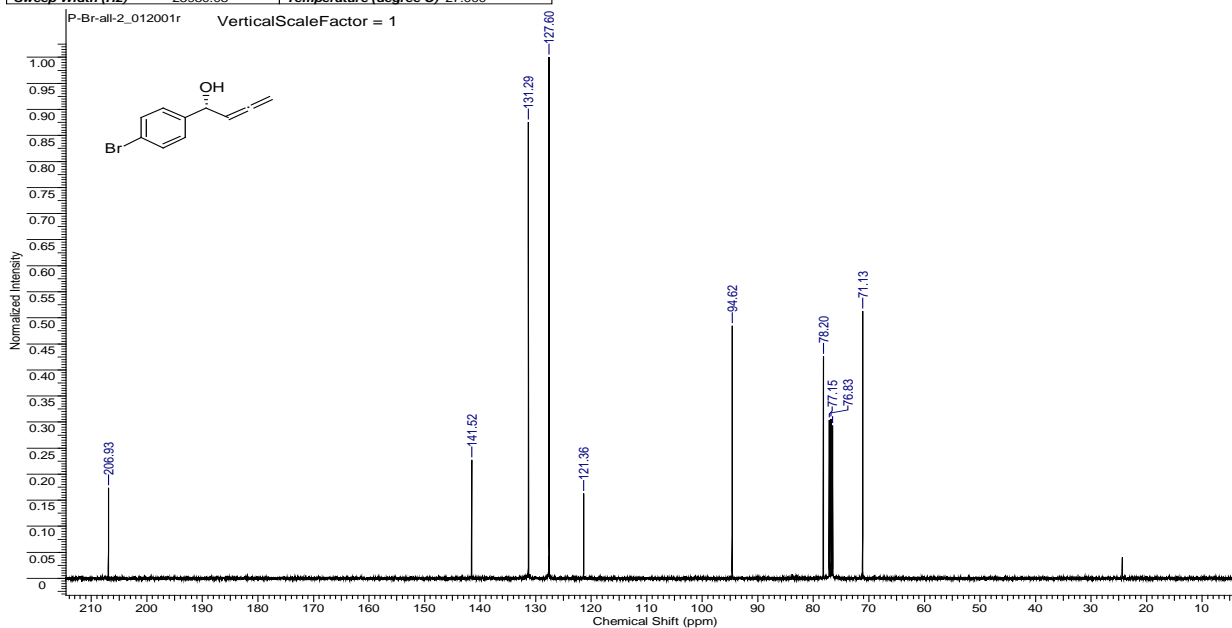

5/16/2012 3:54:14 PM

| Acquisition Time (sec) | 3.9584                                                                                       | Comment                | Chloro-allenyl-p | Date                 | 18 Apr 2012 23:10:56 |
|------------------------|----------------------------------------------------------------------------------------------|------------------------|------------------|----------------------|----------------------|
| Date Stamp             | 18 Apr 2012 23:10:56                                                                         |                        |                  |                      |                      |
| File Name              | C:\Documents and Settings\veletra1\Desktop\Old_Desktop\paper12\NMRs\Chloro-allenyl-p_010001r |                        |                  | Frequency (MHz)      | 400.19               |
| Nucleus                | 1H                                                                                           | Number of Transients   | 16               | Origin               | spect                |
| Owner                  | nmrsu                                                                                        | Points Count           | 32768            | Pulse Sequence       | zg30                 |
| SW(cyclical) (Hz)      | 8278.15                                                                                      | Solvent                | CHLOROFORM-d     | Receiver Gain        | 128.00               |
| Sweep Width (Hz)       | 8277.89                                                                                      | Temperature (degree C) | 27.000           | Spectrum Offset (Hz) | 2455.5339            |

<sup>1</sup>H NMR (400 MHz, CHLOROFORM-d) δ ppm 7.32 (s, 4 H), 5.39 (q, J=6.48 Hz, 1 H), 5.23 (dd, J=4.17, 2.40 Hz, 1 H), 4.86 - 5.00 (m, 2 H), 2.34 (s, 1 H)

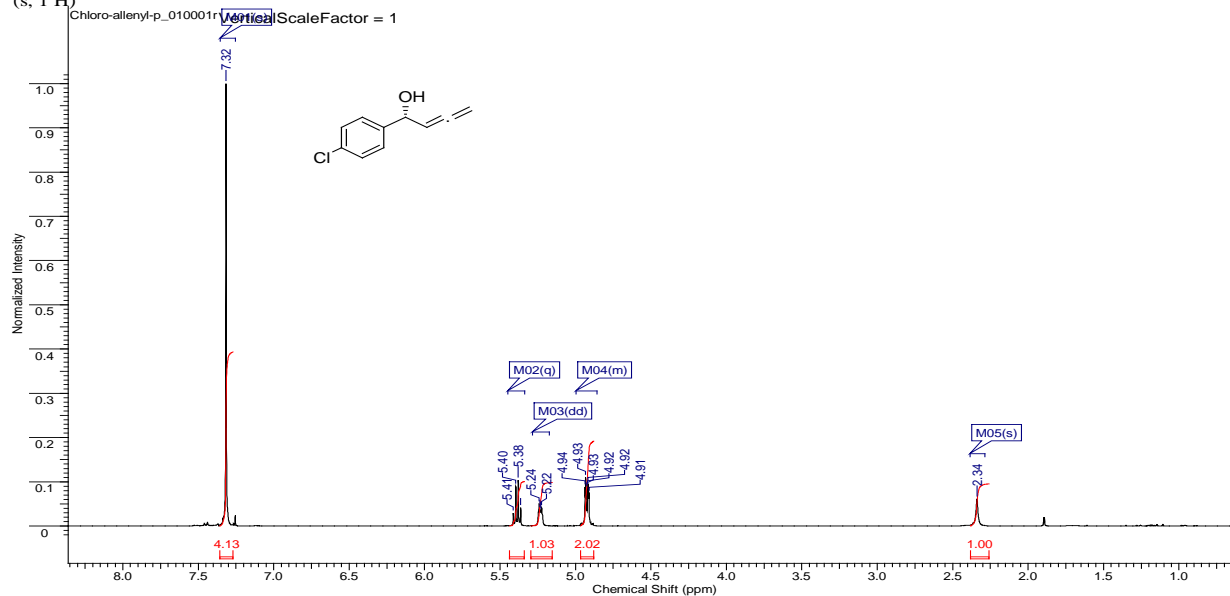

5/16/2012 3:57:46 PM

| Acquisition Time (sec) | 1.3664                                                                                       | Comment                | Chloro-allenyl-p | Date                 | 19 Apr 2012 05:41:20 |
|------------------------|----------------------------------------------------------------------------------------------|------------------------|------------------|----------------------|----------------------|
| Date Stamp             | 19 Apr 2012 05:41:20                                                                         |                        |                  |                      |                      |
| File Name              | C:\Documents and Settings\veletra1\Desktop\Old_Desktop\paper12\NMRs\Chloro-allenyl-p_013001r |                        |                  | Frequency (MHz)      | 100.63               |
| Nucleus                | 13C                                                                                          | Number of Transients   | 2048             | Origin               | spect                |
| Owner                  | nmrsu                                                                                        | Points Count           | 32768            | Pulse Sequence       | zpgg30               |
| SW(cyclical) (Hz)      | 23980.81                                                                                     | Solvent                | CHLOROFORM-d     | Receiver Gain        | 14596.50             |
| Sweep Width (Hz)       | 23980.08                                                                                     | Temperature (degree C) | 27.000           | Spectrum Offset (Hz) | 10062.3271           |

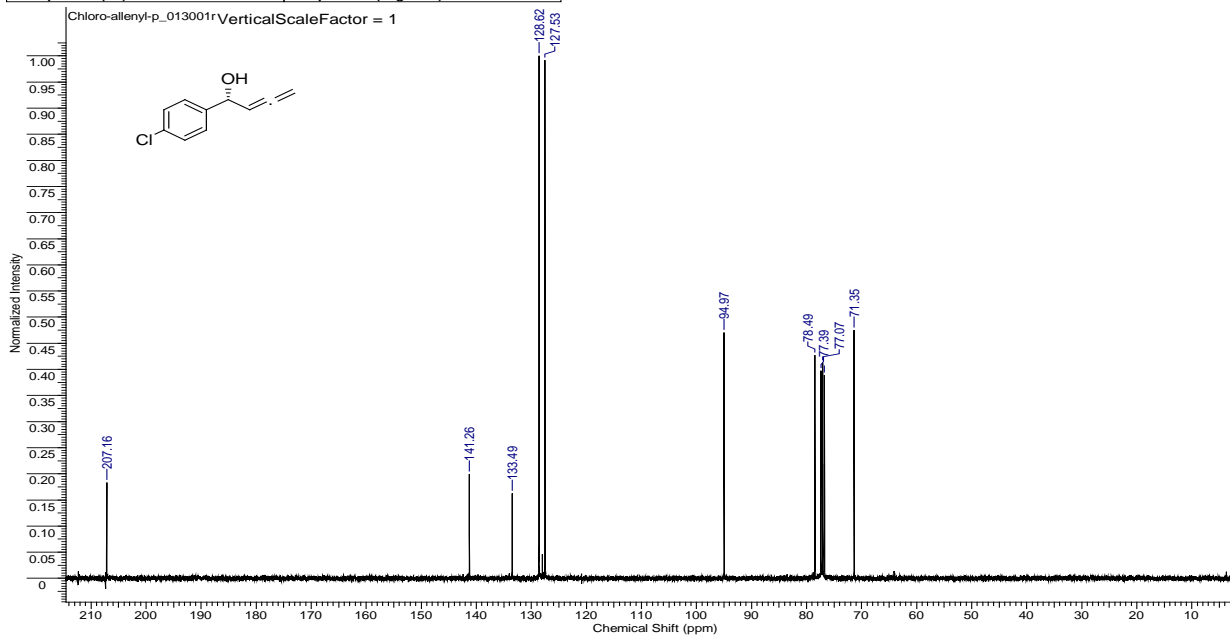



5/16/2012 4:26:29 PM

| Acquisition Time (sec) | Comment                                                                                | P-Br-all-2             | Date         | 06 May 2012 00:00:00 |
|------------------------|----------------------------------------------------------------------------------------|------------------------|--------------|----------------------|
| Date Stamp             | 06 May 2012 00:00:00                                                                   |                        |              |                      |
| File Name              | C:\Documents and Settings\leletra1\Desktop\Old_Desktop\paper12\NMRs\P-Br-all-2_010001r |                        |              | Frequency (MHz)      |
| Nucleus                | <sup>1</sup> H                                                                         | Number of Transients   | 16           | Origin               |
| Owner                  | nmrslu                                                                                 | Points Count           | 32768        | Pulse Sequence       |
| SW(cyclical) (Hz)      | 8278.15                                                                                | Solvent                | CHLOROFORM-d | Receiver Gain        |
| Sweep Width (Hz)       | 8277.89                                                                                | Temperature (degree C) | 27.000       | Spectrum Offset (Hz) |

<sup>1</sup>H NMR (400 MHz, CHLOROFORM-d) δ ppm 7.26 - 7.37 (m, 2 H), 7.11 (d, J=8.34 Hz, 2 H), 5.23 (q, J=6.57 Hz, 1 H), 5.01 - 5.09 (m, 1 H), 4.68 - 4.84 (m, 2 H), 2.30 (br. s., 1 H)

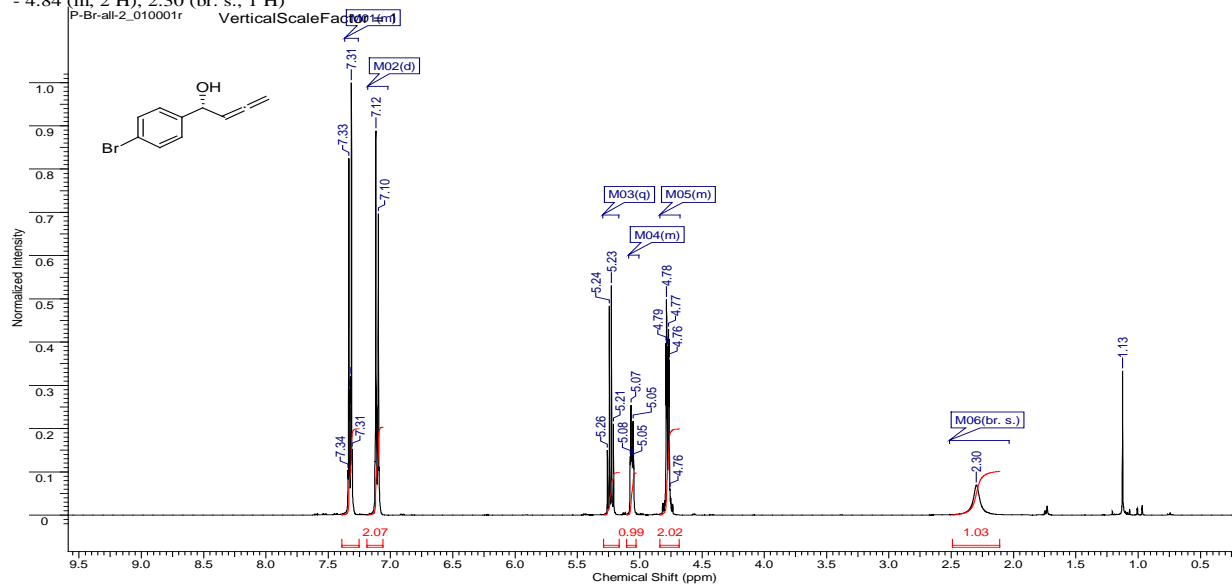

5/16/2012 4:29:03 PM

| Acquisition Time (sec) | Comment                                                                                | P-Br-all-2             | Date         | 06 May 2012 01:16:48 |
|------------------------|----------------------------------------------------------------------------------------|------------------------|--------------|----------------------|
| Date Stamp             | 06 May 2012 01:16:48                                                                   |                        |              |                      |
| File Name              | C:\Documents and Settings\leletra1\Desktop\Old_Desktop\paper12\NMRs\P-Br-all-2_012001r |                        |              | Frequency (MHz)      |
| Nucleus                | <sup>13</sup> C                                                                        | Number of Transients   | 2048         | Origin               |
| Owner                  | nmrslu                                                                                 | Points Count           | 32768        | Pulse Sequence       |
| SW(cyclical) (Hz)      | 23980.81                                                                               | Solvent                | CHLOROFORM-d | Receiver Gain        |
| Sweep Width (Hz)       | 23980.08                                                                               | Temperature (degree C) | 27.000       | Spectrum Offset (Hz) |

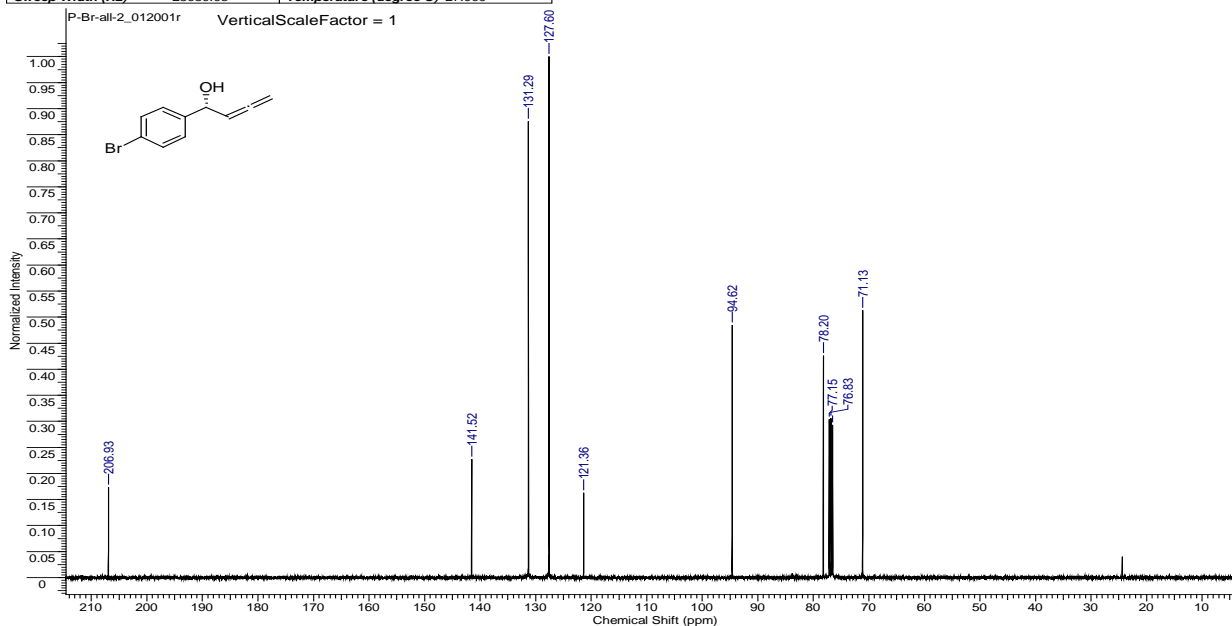

5/16/2012 5:12:54 PM

| Acquisition Time (sec) | 3.9584                                                                                   | Comment                | Ph-allenyl-1 | Date                 | 23 Apr 2012 18:52:48 |
|------------------------|------------------------------------------------------------------------------------------|------------------------|--------------|----------------------|----------------------|
| Date Stamp             | 23 Apr 2012 18:52:48                                                                     |                        |              |                      |                      |
| File Name              | C:\Documents and Settings\leletra1\Desktop\Old_Desktop\paper12\NMRs\Ph-allenyl-1_010001r |                        |              | Frequency (MHz)      | 400.19               |
| Nucleus                | <sup>1</sup> H                                                                           | Number of Transients   | 16           | Origin               | spect                |
| Owner                  | nmrsu                                                                                    | Points Count           | 32768        | Pulse Sequence       | zg30                 |
| SW(cyclical) (Hz)      | 8278.15                                                                                  | Solvent                | CHLOROFORM-d | Receiver Gain        | 128.00               |
| Sweep Width (Hz)       | 8277.89                                                                                  | Temperature (degree C) | 27.000       | Spectrum Offset (Hz) | 2451.4324            |

<sup>1</sup>H NMR (400 MHz, CHLOROFORM-d) δ ppm 7.15 - 7.45 (m, 5 H), 5.44 (q, *J*=6.57 Hz, 1 H), 5.26 (d, *J*=6.32 Hz, 1 H), 4.83 - 5.01 (m, 2 H), 2.25 (s, 1 H)

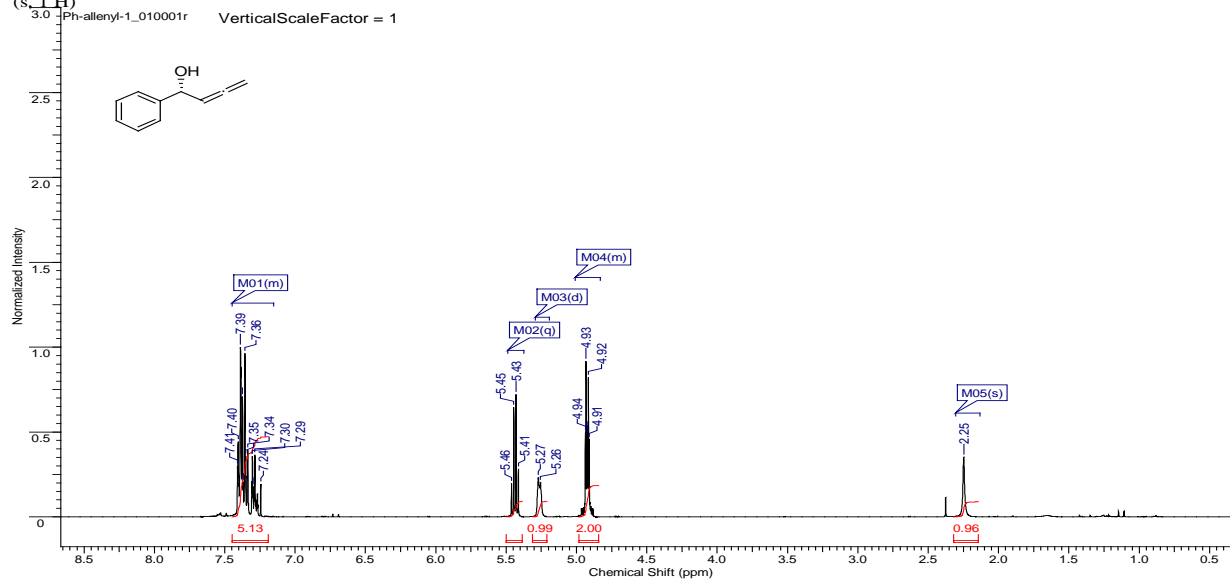

5/16/2012 5:15:21 PM

| Acquisition Time (sec) | 1.3664                                                                                   | Comment                | Ph-allenyl-1 | Date                 | 24 Apr 2012 05:41:20 |
|------------------------|------------------------------------------------------------------------------------------|------------------------|--------------|----------------------|----------------------|
| Date Stamp             | 24 Apr 2012 05:41:20                                                                     |                        |              |                      |                      |
| File Name              | C:\Documents and Settings\leletra1\Desktop\Old_Desktop\paper12\NMRs\Ph-allenyl-1_013001r |                        |              | Frequency (MHz)      | 100.63               |
| Nucleus                | <sup>13</sup> C                                                                          | Number of Transients   | 2048         | Origin               | spect                |
| Owner                  | nmrsu                                                                                    | Points Count           | 32768        | Pulse Sequence       | zgpg30               |
| SW(cyclical) (Hz)      | 23980.81                                                                                 | Solvent                | CHLOROFORM-d | Receiver Gain        | 8192.00              |
| Sweep Width (Hz)       | 23980.08                                                                                 | Temperature (degree C) | 27.000       | Spectrum Offset (Hz) | 10062.3271           |

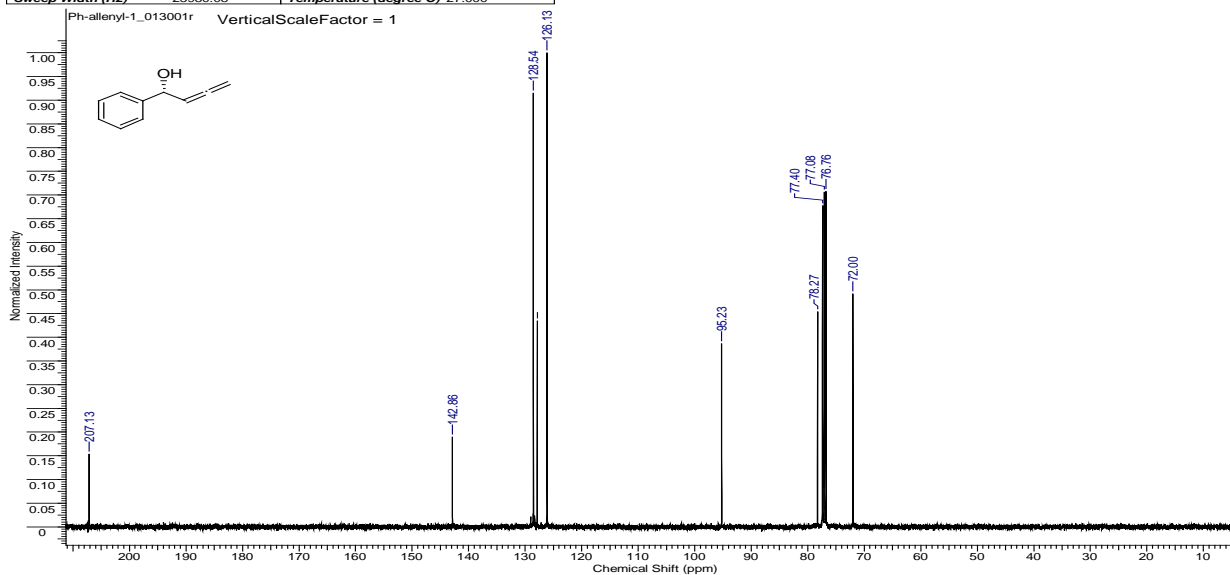

5/16/2012 5:36:23 PM

|                               |                                                                                           |                               |               |                             |                      |
|-------------------------------|-------------------------------------------------------------------------------------------|-------------------------------|---------------|-----------------------------|----------------------|
| <b>Acquisition Time (sec)</b> | 3.9584                                                                                    | <b>Comment</b>                | OMe-allenyl-1 | <b>Date</b>                 | 04 May 2012 23:47:12 |
| <b>Date Stamp</b>             | 04 May 2012 23:47:12                                                                      |                               |               |                             |                      |
| <b>File Name</b>              | C:\Documents and Settings\leletra1\Desktop\Old_Desktop\paper12\NMRs\OMe-allenyl-1_010001r |                               |               | <b>Frequency (MHz)</b>      | 400.19               |
| <b>Nucleus</b>                | <sup>1</sup> H                                                                            | <b>Number of Transients</b>   | 16            | <b>Origin</b>               | spect                |
| <b>Owner</b>                  | nmsu                                                                                      | <b>Points Count</b>           | 32768         | <b>Pulse Sequence</b>       | zg30                 |
| <b>SW(cyclical) (Hz)</b>      | 8278.15                                                                                   | <b>Solvent</b>                | CHLOROFORM-d  | <b>Receiver Gain</b>        | 128.00               |
| <b>Sweep Width (Hz)</b>       | 8277.89                                                                                   | <b>Temperature (degree C)</b> | 27.000        | <b>Spectrum Offset (Hz)</b> | 2396.3875            |

<sup>1</sup>H NMR (400 MHz, CHLOROFORM-d) δ ppm 7.28 - 7.39 (m, 1H), 6.93 - 7.15 (m, 3 H), 5.31 - 5.38 (m, 1 H), 5.25 (q, J=6.48 Hz, 1 H), 4.64 - 4.82 (m, 2 H), 2.21 (s, 3 H)

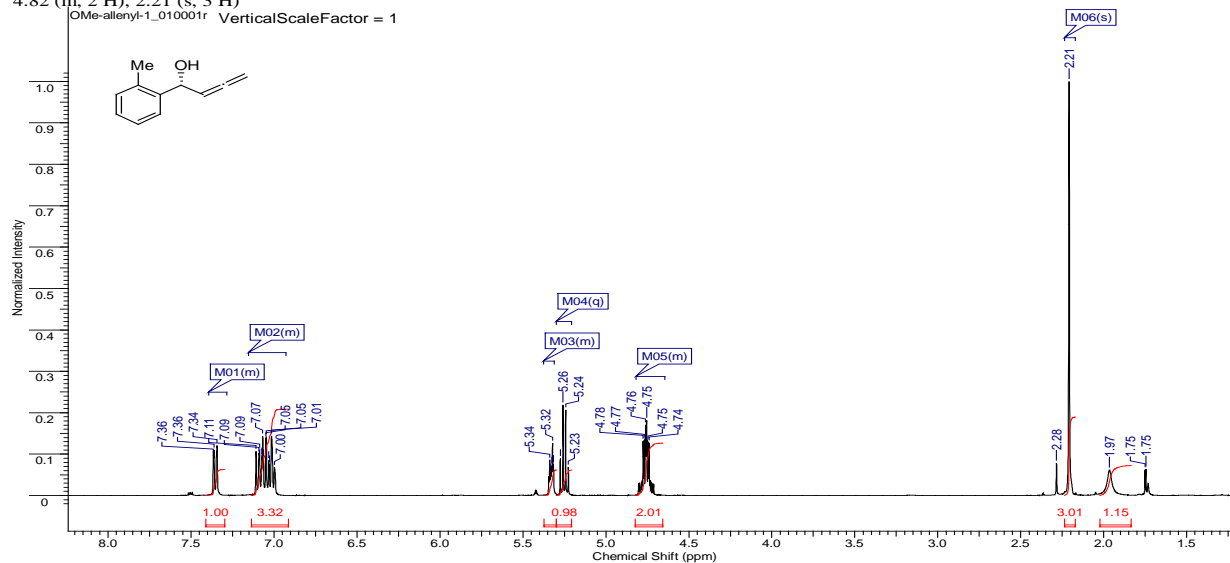

5/16/2012 5:39:29 PM

|                               |                                                                                           |                               |               |                             |                      |
|-------------------------------|-------------------------------------------------------------------------------------------|-------------------------------|---------------|-----------------------------|----------------------|
| <b>Acquisition Time (sec)</b> | 1.3664                                                                                    | <b>Comment</b>                | OMe-allenyl-1 | <b>Date</b>                 | 05 May 2012 00:23:28 |
| <b>Date Stamp</b>             | 05 May 2012 00:23:28                                                                      |                               |               |                             |                      |
| <b>File Name</b>              | C:\Documents and Settings\leletra1\Desktop\Old_Desktop\paper12\NMRs\OMe-allenyl-1_011001r |                               |               | <b>Frequency (MHz)</b>      | 100.63               |
| <b>Nucleus</b>                | <sup>13</sup> C                                                                           | <b>Number of Transients</b>   | 256           | <b>Origin</b>               | spect                |
| <b>Owner</b>                  | nmsu                                                                                      | <b>Points Count</b>           | 32768         | <b>Pulse Sequence</b>       | zgpg30               |
| <b>SW(cyclical) (Hz)</b>      | 23980.81                                                                                  | <b>Solvent</b>                | CHLOROFORM-d  | <b>Receiver Gain</b>        | 8192.00              |
| <b>Sweep Width (Hz)</b>       | 23980.08                                                                                  | <b>Temperature (degree C)</b> | 27.000        | <b>Spectrum Offset (Hz)</b> | 11042.7217           |

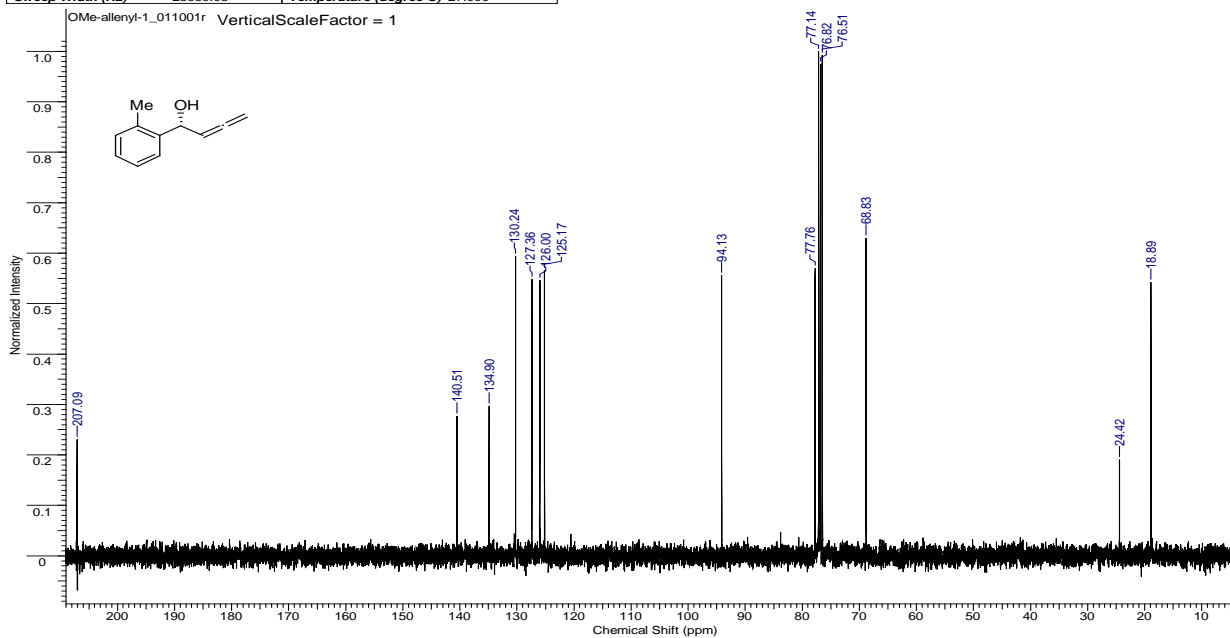

5/16/2012 5:58:55 PM

|                               |                                                                                |                               |                |                             |                      |
|-------------------------------|--------------------------------------------------------------------------------|-------------------------------|----------------|-----------------------------|----------------------|
| <b>Acquisition Time (sec)</b> | 3.9584                                                                         | <b>Comment</b>                | 0-Methyl-all-2 | <b>Date</b>                 | 05 May 2012 23:15:12 |
| <b>Date Stamp</b>             | 05 May 2012 23:15:12                                                           |                               |                |                             |                      |
| <b>File Name</b>              | C:\Documents and Settings\veletra1\Desktop\paper12\NMRs\0-Methyl-all-2_010001r |                               |                | <b>Frequency (MHz)</b>      | 400.19               |
| <b>Nucleus</b>                | <sup>1</sup> H                                                                 | <b>Number of Transients</b>   | 16             | <b>Origin</b>               | spect                |
| <b>Owner</b>                  | nmrsu                                                                          | <b>Points Count</b>           | 32768          | <b>Pulse Sequence</b>       | zg30                 |
| <b>SW(cyclical) (Hz)</b>      | 8278.15                                                                        | <b>Solvent</b>                | CHLOROFORM-d   | <b>Receiver Gain</b>        | 101.60               |
| <b>Sweep Width (Hz)</b>       | 8277.89                                                                        | <b>Temperature (degree C)</b> | 27.000         | <b>Spectrum Offset (Hz)</b> | 2449.8203            |

<sup>1</sup>H NMR (400 MHz, CHLOROFORM-d) δ ppm 7.28 (d, *J*=8.08 Hz, 2 H), 7.16 (d, *J*=7.83 Hz, 2 H), 5.42 (q, *J*=6.57 Hz, 1 H), 5.18 - 5.29 (m, 1 H), 4.84 - 4.98 (m, 2 H), 2.34 (s, 3 H), 2.13 (br. s., 1 H)

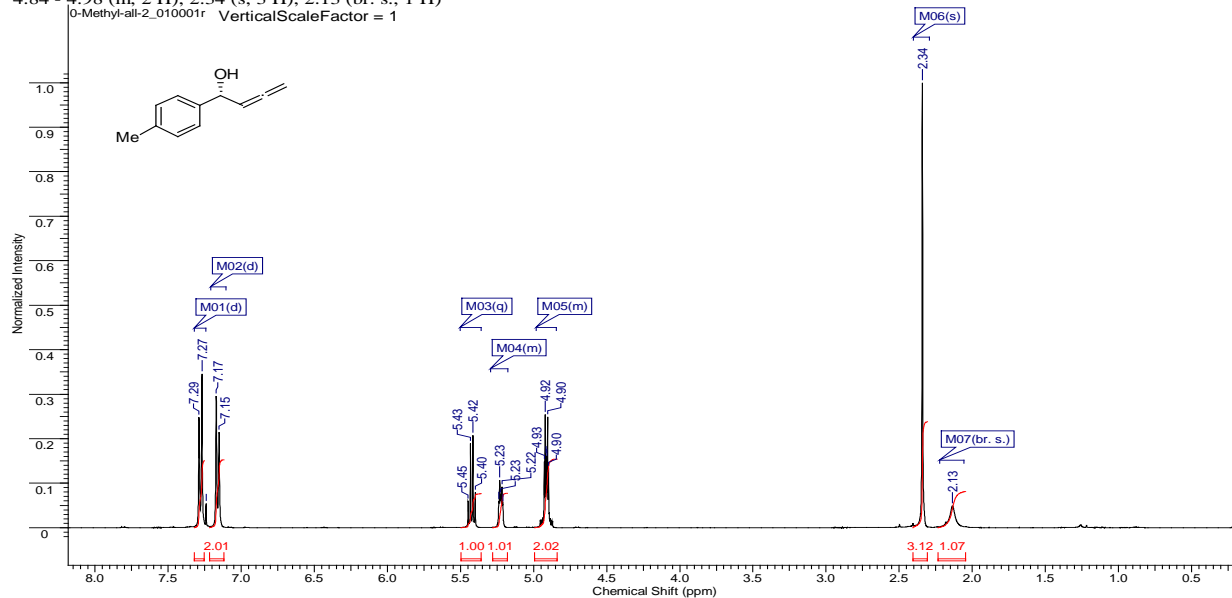

5/16/2012 6:02:02 PM

|                               |                                                                                |                               |                |                             |                      |
|-------------------------------|--------------------------------------------------------------------------------|-------------------------------|----------------|-----------------------------|----------------------|
| <b>Acquisition Time (sec)</b> | 1.3664                                                                         | <b>Comment</b>                | 0-Methyl-all-2 | <b>Date</b>                 | 06 May 2012 02:40:00 |
| <b>Date Stamp</b>             | 06 May 2012 02:40:00                                                           |                               |                |                             |                      |
| <b>File Name</b>              | C:\Documents and Settings\veletra1\Desktop\paper12\NMRs\0-Methyl-all-2_012001r |                               |                | <b>Frequency (MHz)</b>      | 100.63               |
| <b>Nucleus</b>                | <sup>13</sup> C                                                                | <b>Number of Transients</b>   | 2048           | <b>Origin</b>               | spect                |
| <b>Owner</b>                  | nmrsu                                                                          | <b>Points Count</b>           | 32768          | <b>Pulse Sequence</b>       | zgpg30               |
| <b>SW(cyclical) (Hz)</b>      | 23980.81                                                                       | <b>Solvent</b>                | CHLOROFORM-d   | <b>Receiver Gain</b>        | 13004.00             |
| <b>Sweep Width (Hz)</b>       | 23980.08                                                                       | <b>Temperature (degree C)</b> | 27.000         | <b>Spectrum Offset (Hz)</b> | 10062.3271           |

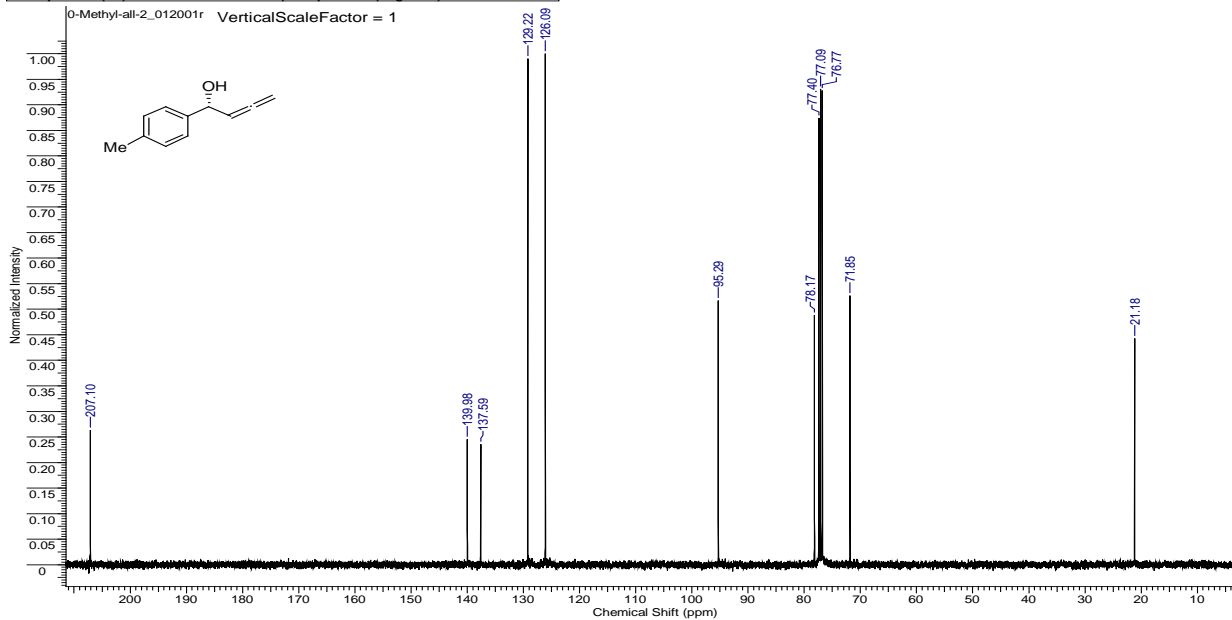

5/16/2012 6:30:09 PM

|                        |                                                                                         |                        |              |                      |                      |
|------------------------|-----------------------------------------------------------------------------------------|------------------------|--------------|----------------------|----------------------|
| Acquisition Time (sec) | 3.9584                                                                                  | Comment                | P-OMe-all-2  | Date                 | 05 May 2012 23:28:00 |
| Date Stamp             | 05 May 2012 23:28:00                                                                    |                        |              |                      |                      |
| File Name              | C:\Documents and Settings\leletra1\Desktop\Old_Desktop\paper12\NMRs\p-OMe-all-2_010001r |                        |              | Frequency (MHz)      | 400.19               |
| Nucleus                | <sup>1</sup> H                                                                          | Number of Transients   | 16           | Origin               | spect                |
| Owner                  | nmsu                                                                                    | Points Count           | 32768        | Pulse Sequence       | zg30                 |
| SW(cyclical) (Hz)      | 8278.15                                                                                 | Solvent                | CHLOROFORM-d | Receiver Gain        | 181.00               |
| Sweep Width (Hz)       | 8277.89                                                                                 | Temperature (degree C) | 27.000       | Spectrum Offset (Hz) | 2471.1260            |

<sup>1</sup>H NMR (400 MHz, CHLOROFORM-d) δ ppm 7.24 - 7.39 (m, 2 H), 6.85 - 6.96 (m, 2 H), 5.21 (t, *J*=2.91 Hz, 1 H), 4.71 (dd, *J*=4.93, 3.16 Hz, 2 H), 3.75 - 3.89 (m, 4 H), 1.91 (s, 1 H)

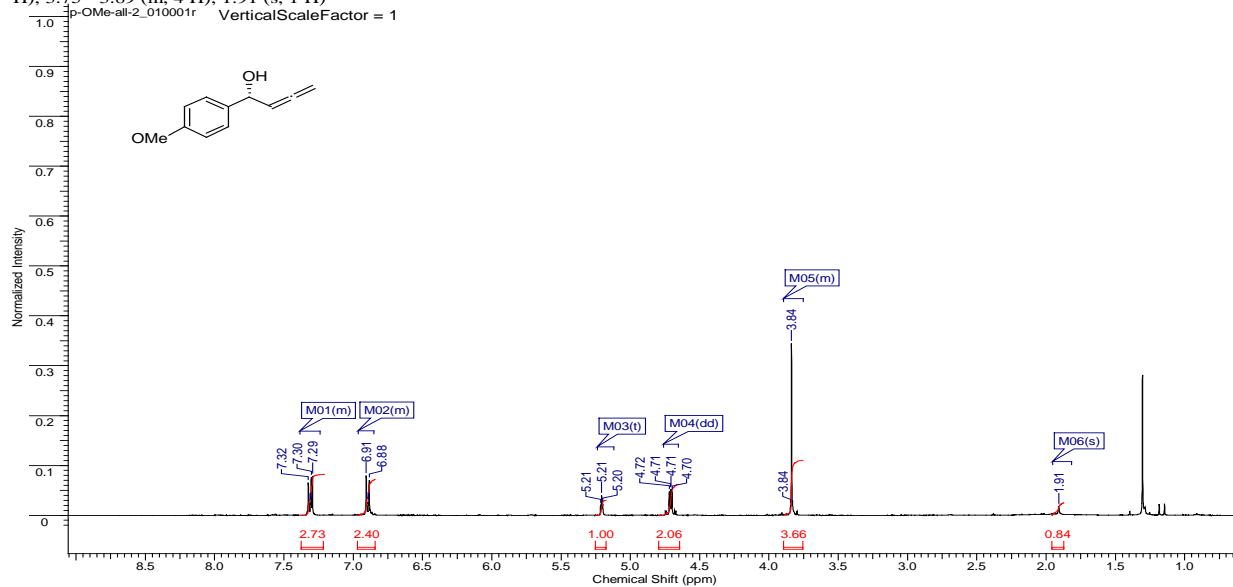

5/16/2012 6:33:26 PM

|                        |                                                                                         |                        |              |                      |                      |
|------------------------|-----------------------------------------------------------------------------------------|------------------------|--------------|----------------------|----------------------|
| Acquisition Time (sec) | 1.3664                                                                                  | Comment                | P-OMe-all-2  | Date                 | 06 May 2012 14:15:28 |
| Date Stamp             | 06 May 2012 14:15:28                                                                    |                        |              |                      |                      |
| File Name              | C:\Documents and Settings\leletra1\Desktop\Old_Desktop\paper12\NMRs\p-OMe-all-2_013001r |                        |              | Frequency (MHz)      | 100.63               |
| Nucleus                | <sup>13</sup> C                                                                         | Number of Transients   | 20000        | Origin               | spect                |
| Owner                  | nmsu                                                                                    | Points Count           | 32768        | Pulse Sequence       | zgpg30               |
| SW(cyclical) (Hz)      | 23980.81                                                                                | Solvent                | CHLOROFORM-d | Receiver Gain        | 8192.00              |
| Sweep Width (Hz)       | 23980.08                                                                                | Temperature (degree C) | 27.000       | Spectrum Offset (Hz) | 10176.9072           |

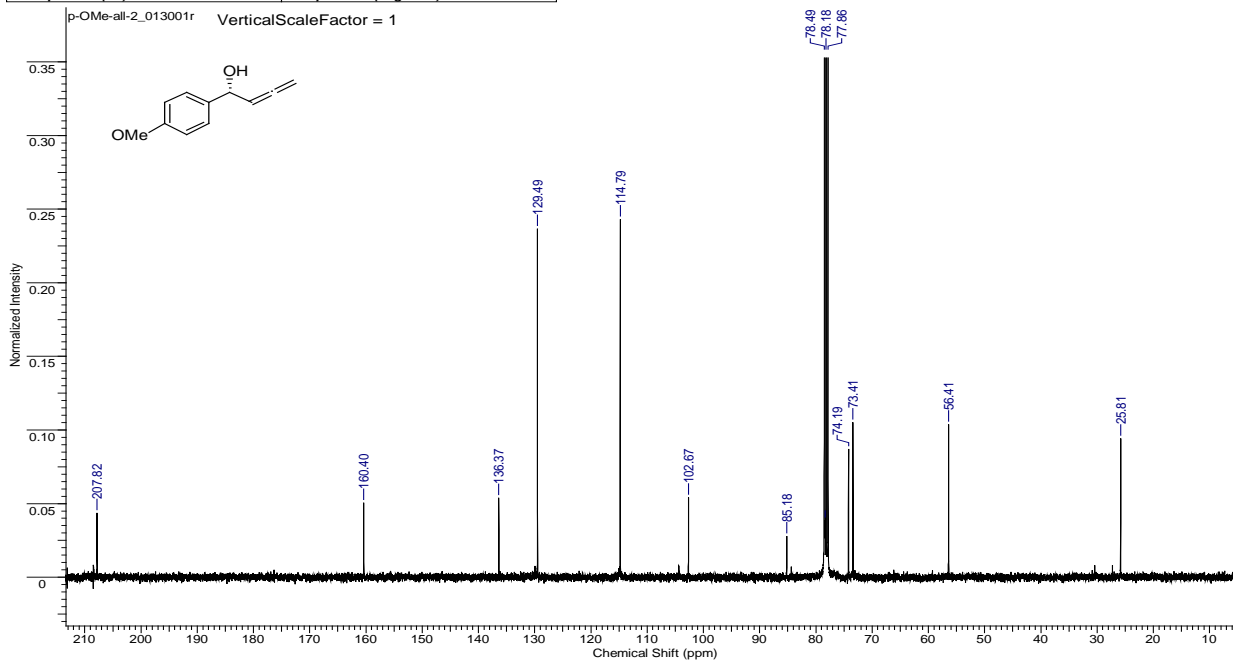

5/16/2012 7:50:12 PM

| Acquisition Time (sec) | Comment                                                                                | Thio-all-2             | Date         | 07 May 2012 02:05:52 |           |
|------------------------|----------------------------------------------------------------------------------------|------------------------|--------------|----------------------|-----------|
| Date Stamp             | 07 May 2012 02:05:52                                                                   |                        |              |                      |           |
| File Name              | C:\Documents and Settings\leletra1\Desktop\Old_Desktop\paper12\NMRs\Thio-all-2_012001r |                        |              | Frequency (MHz)      | 400.19    |
| Nucleus                | <sup>1</sup> H                                                                         | Number of Transients   | 1024         | Origin               | spect     |
| Owner                  | nmrsu                                                                                  | Points Count           | 32768        | Pulse Sequence       | zg30      |
| SW(cyclical) (Hz)      | 8278.15                                                                                | Solvent                | CHLOROFORM-d | Receiver Gain        | 128.00    |
| Sweep Width (Hz)       | 8277.89                                                                                | Temperature (degree C) | 27.000       | Spectrum Offset (Hz) | 2399.9490 |

<sup>1</sup>H NMR (400 MHz, CHLOROFORM-d) δ ppm 7.10 - 7.18 (m, 1 H), 6.77 - 6.95 (m, 2 H), 5.26 - 5.50 (m, 2 H), 4.70 - 4.94 (m, 2 H), 2.27 (d, J=3.79 Hz, 11 H)

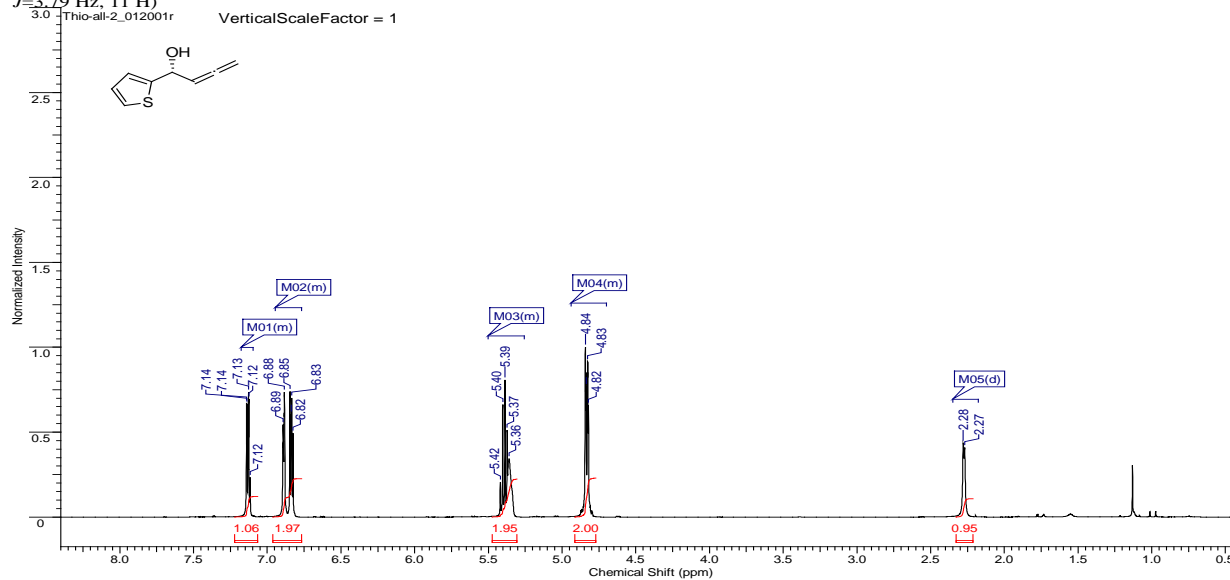

5/16/2012 7:52:22 PM

| Acquisition Time (sec) | Comment                                                                                | Thio-all-2             | Date         | 07 May 2012 03:14:08 |            |
|------------------------|----------------------------------------------------------------------------------------|------------------------|--------------|----------------------|------------|
| Date Stamp             | 07 May 2012 03:14:08                                                                   |                        |              |                      |            |
| File Name              | C:\Documents and Settings\leletra1\Desktop\Old_Desktop\paper12\NMRs\Thio-all-2_013001r |                        |              | Frequency (MHz)      | 100.63     |
| Nucleus                | <sup>13</sup> C                                                                        | Number of Transients   | 2048         | Origin               | spect      |
| Owner                  | nmrsu                                                                                  | Points Count           | 32768        | Pulse Sequence       | zgpg30     |
| SW(cyclical) (Hz)      | 23980.81                                                                               | Solvent                | CHLOROFORM-d | Receiver Gain        | 8192.00    |
| Sweep Width (Hz)       | 23980.08                                                                               | Temperature (degree C) | 27.000       | Spectrum Offset (Hz) | 10062.3271 |

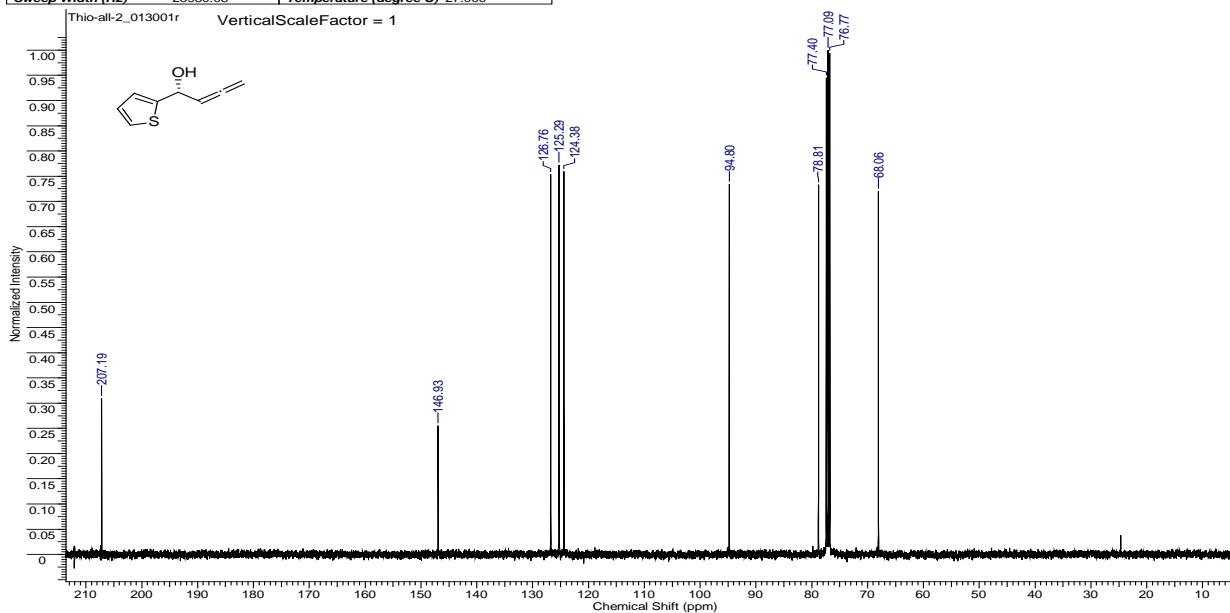

5/16/2012 10:31:21 PM

|                        |                                                                                                |                        |                    |                      |                      |
|------------------------|------------------------------------------------------------------------------------------------|------------------------|--------------------|----------------------|----------------------|
| Acquisition Time (sec) | 3.9584                                                                                         | Comment                | Cinnamyl-allenyl-1 | Date                 | 25 Apr 2012 05:41:20 |
| Date Stamp             | 25 Apr 2012 05:41:20                                                                           |                        |                    |                      |                      |
| File Name              | C:\Documents and Settings\leletra1\Desktop\Old_Desktop\paper12\NMRs\Cinnamyl-allenyl-1_013001r |                        |                    | Frequency (MHz)      | 400.19               |
| Nucleus                | 1H                                                                                             | Number of Transients   | 1024               | Origin               | spect                |
| Owner                  | nmsu                                                                                           | Points Count           | 32768              | Pulse Sequence       | zq30                 |
| SW(cyclical) (Hz)      | 8278.15                                                                                        | Solvent                | CHLOROFORM-d       | Spectrum Offset (Hz) | 2450.5845            |
| Sweep Width (Hz)       | 8277.89                                                                                        | Temperature (degree C) | 27.000             |                      |                      |

<sup>1</sup>H NMR (400 MHz, CHLOROFORM-d) δ ppm 7.35 - 7.42 (m, 2 H), 7.27 - 7.35 (m, 2 H), 7.19 - 7.27 (m, 1 H), 6.63 (d, J=15.66 Hz, 1 H), 6.27 (dd, J=15.92, 6.32 Hz, 1 H), 5.36 (q, J=6.32 Hz, 1 H), 4.92 (dd, J=6.57, 2.53 Hz, 2 H), 4.80 - 4.89 (m, 1 H), 2.13 (br. s., 1 H)

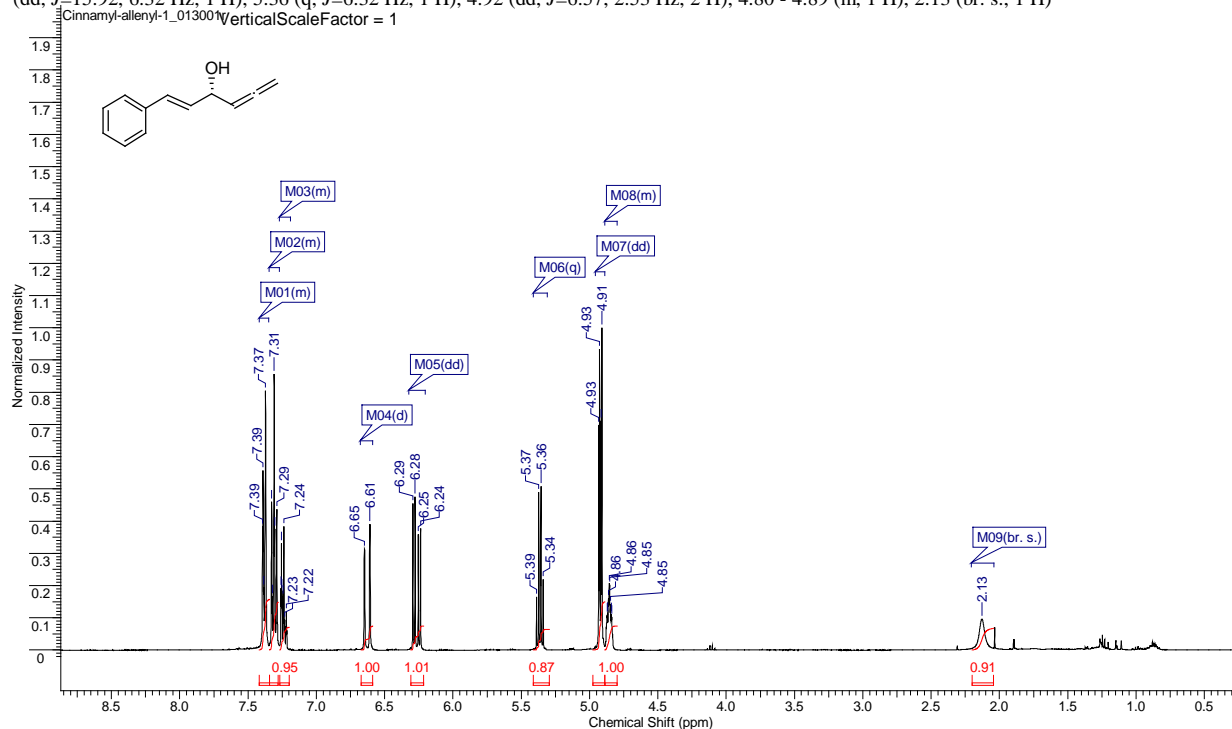

5/16/2012 10:35:54 PM

|                        |                                                                                                |                        |                    |                      |                      |
|------------------------|------------------------------------------------------------------------------------------------|------------------------|--------------------|----------------------|----------------------|
| Acquisition Time (sec) | 1.3664                                                                                         | Comment                | Cinnamyl-allenyl-1 | Date                 | 25 Apr 2012 04:16:00 |
| Date Stamp             | 25 Apr 2012 04:16:00                                                                           |                        |                    |                      |                      |
| File Name              | C:\Documents and Settings\leletra1\Desktop\Old_Desktop\paper12\NMRs\Cinnamyl-allenyl-1_012001r |                        |                    | Frequency (MHz)      | 100.63               |
| Nucleus                | 13C                                                                                            | Number of Transients   | 2048               | Origin               | spect                |
| Owner                  | nmsu                                                                                           | Points Count           | 32768              | Pulse Sequence       | zpg30                |
| SW(cyclical) (Hz)      | 23980.81                                                                                       | Solvent                | CHLOROFORM-d       | Receiver Gain        | 16384.00             |
| Sweep Width (Hz)       | 23980.08                                                                                       | Temperature (degree C) | 27.000             | Spectrum Offset (Hz) | 10062.3271           |

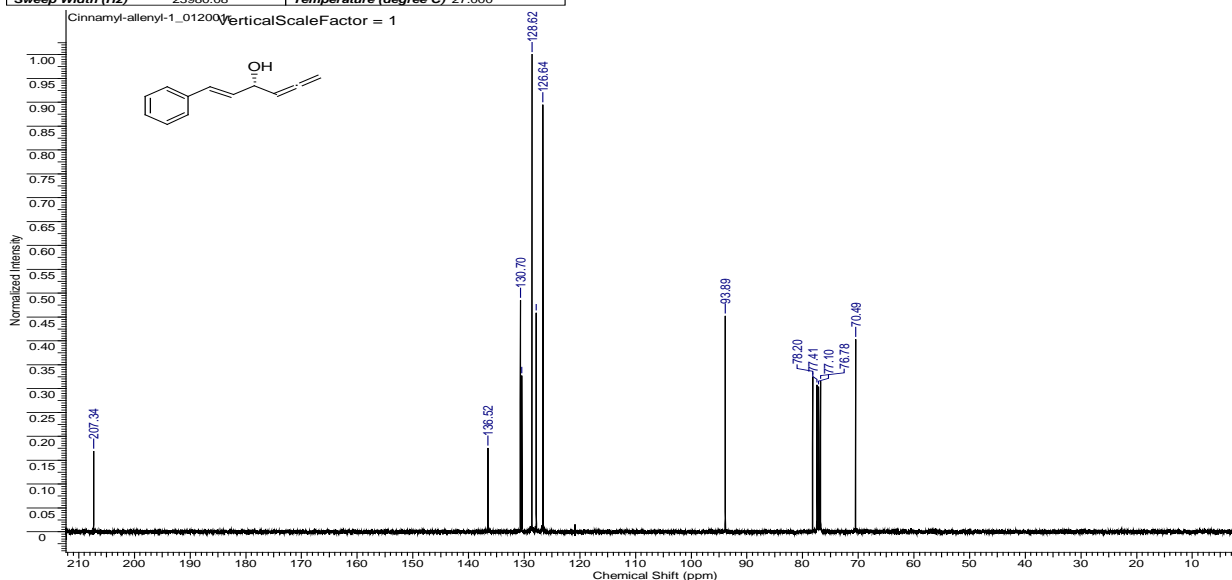

5/16/2012 3:54:14 PM

|                        |                                                                                              |                        |                  |                      |                      |
|------------------------|----------------------------------------------------------------------------------------------|------------------------|------------------|----------------------|----------------------|
| Acquisition Time (sec) | 3.9584                                                                                       | Comment                | Chloro-allenyl-p | Date                 | 18 Apr 2012 23:10:56 |
| Date Stamp             | 18 Apr 2012 23:10:56                                                                         |                        |                  |                      |                      |
| File Name              | C:\Documents and Settings\leletra1\Desktop\Old_Desktop\paper12\NMRs\Chloro-allenyl-p_010001r |                        |                  | Frequency (MHz)      | 400.19               |
| Nucleus                | <sup>1</sup> H                                                                               | Number of Transients   | 16               | Origin               | spect                |
| Owner                  | nmrsu                                                                                        | Points Count           | 32768            | Pulse Sequence       | zg30                 |
| SW(cyclical) (Hz)      | 8278.15                                                                                      | Solvent                | CHLOROFORM-d     | Receiver Gain        | 128.00               |
| Sweep Width (Hz)       | 8277.89                                                                                      | Temperature (degree C) | 27.000           | Spectrum Offset (Hz) | 2455.5339            |

<sup>1</sup>H NMR (400 MHz, CHLOROFORM-*d*) δ ppm 7.32 (s, 4 H), 5.39 (q, *J*=6.48 Hz, 1 H), 5.23 (dd, *J*=4.17, 2.40 Hz, 1 H), 4.86 - 5.00 (m, 2 H), 2.34 (s, 1 H)

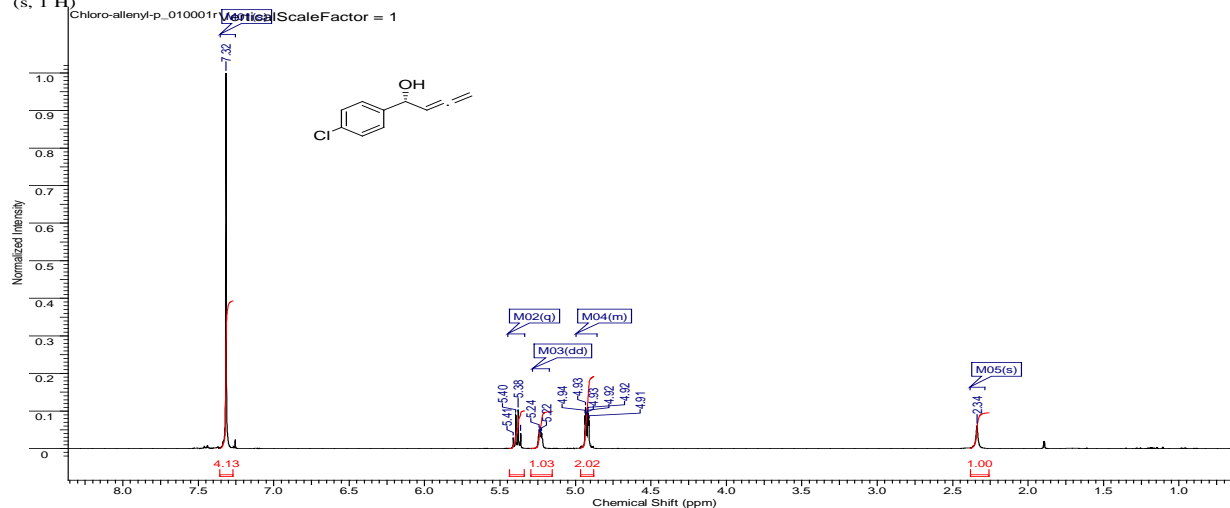

5/16/2012 3:57:46 PM

|                        |                                                                                              |                        |                  |                      |                      |
|------------------------|----------------------------------------------------------------------------------------------|------------------------|------------------|----------------------|----------------------|
| Acquisition Time (sec) | 1.3664                                                                                       | Comment                | Chloro-allenyl-p | Date                 | 19 Apr 2012 05:41:20 |
| Date Stamp             | 19 Apr 2012 05:41:20                                                                         |                        |                  |                      |                      |
| File Name              | C:\Documents and Settings\leletra1\Desktop\Old_Desktop\paper12\NMRs\Chloro-allenyl-p_013001r |                        |                  | Frequency (MHz)      | 100.63               |
| Nucleus                | <sup>13</sup> C                                                                              | Number of Transients   | 2048             | Origin               | spect                |
| Owner                  | nmrsu                                                                                        | Points Count           | 32768            | Pulse Sequence       | zgpg30               |
| SW(cyclical) (Hz)      | 23980.81                                                                                     | Solvent                | CHLOROFORM-d     | Receiver Gain        | 14596.50             |
| Sweep Width (Hz)       | 23980.08                                                                                     | Temperature (degree C) | 27.000           | Spectrum Offset (Hz) | 10062.3271           |

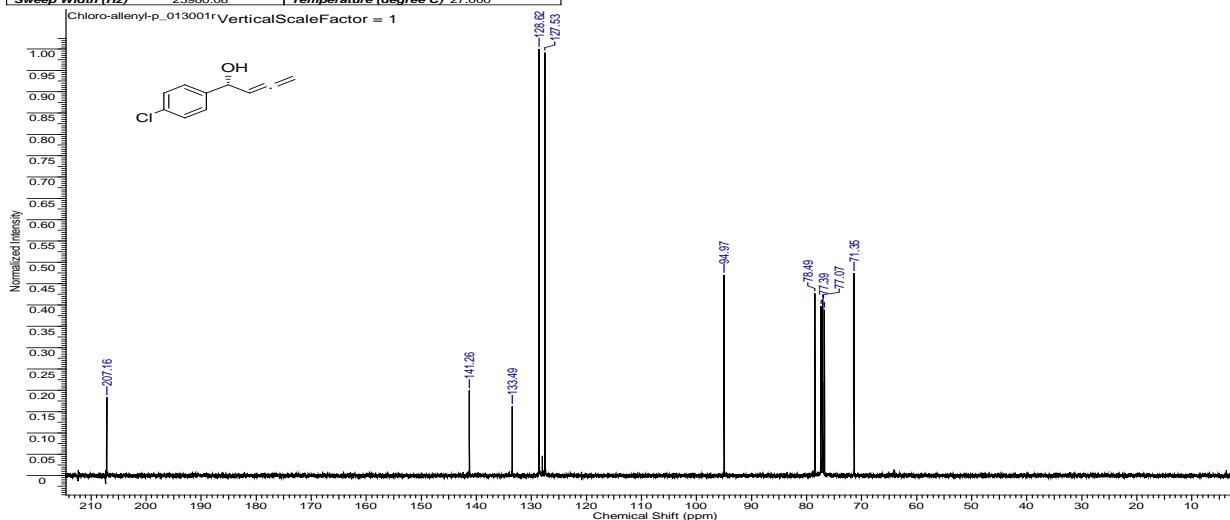



5/16/2012 4:26:29 PM

| Acquisition Time (sec) | Comment                                                                                | P-Br-all-2             | Date         | 06 May 2012 00:00:00 |
|------------------------|----------------------------------------------------------------------------------------|------------------------|--------------|----------------------|
| Date Stamp             | 06 May 2012 00:00:00                                                                   |                        |              |                      |
| File Name              | C:\Documents and Settings\leletra1\Desktop\Old_Desktop\paper12\NMRs\P-Br-all-2_010001r |                        |              | Frequency (MHz)      |
| Nucleus                | <sup>1</sup> H                                                                         | Number of Transients   | 16           | Origin               |
| Owner                  | nmrsu                                                                                  | Points Count           | 32768        | Pulse Sequence       |
| SW(cyclical) (Hz)      | 8278.15                                                                                | Solvent                | CHLOROFORM-d | Receiver Gain        |
| Sweep Width (Hz)       | 8277.89                                                                                | Temperature (degree C) | 27.000       | Spectrum Offset (Hz) |
|                        |                                                                                        |                        |              | 2400.6772            |

<sup>1</sup>H NMR (400 MHz, CHLOROFORM-d) δ ppm 7.26 - 7.37 (m, 2 H), 7.11 (d, J=8.34 Hz, 2 H), 5.23 (q, J=6.57 Hz, 1 H), 5.01 - 5.09 (m, 1 H), 4.68 - 4.84 (m, 2 H), 2.30 (br. s., 1 H)



5/16/2012 4:29:03 PM

| Acquisition Time (sec) | Comment                                                                                | P-Br-all-2             | Date         | 06 May 2012 01:16:48 |
|------------------------|----------------------------------------------------------------------------------------|------------------------|--------------|----------------------|
| Date Stamp             | 06 May 2012 01:16:48                                                                   |                        |              |                      |
| File Name              | C:\Documents and Settings\leletra1\Desktop\Old_Desktop\paper12\NMRs\P-Br-all-2_012001r |                        |              | Frequency (MHz)      |
| Nucleus                | <sup>13</sup> C                                                                        | Number of Transients   | 2048         | Origin               |
| Owner                  | nmrsu                                                                                  | Points Count           | 32768        | Pulse Sequence       |
| SW(cyclical) (Hz)      | 23980.81                                                                               | Solvent                | CHLOROFORM-d | Receiver Gain        |
| Sweep Width (Hz)       | 23980.08                                                                               | Temperature (degree C) | 27.000       | Spectrum Offset (Hz) |
|                        |                                                                                        |                        |              | 10035.1045           |



5/16/2012 11:00:43 PM

|                               |                                                                                              |                               |                  |                             |                      |
|-------------------------------|----------------------------------------------------------------------------------------------|-------------------------------|------------------|-----------------------------|----------------------|
| <b>Acquisition Time (sec)</b> | 3.9584                                                                                       | <b>Comment</b>                | Phch2ch2-alleny2 | <b>Date</b>                 | 27 Apr 2012 18:46:24 |
| <b>Date Stamp</b>             | 27 Apr 2012 18:46:24                                                                         |                               |                  |                             |                      |
| <b>File Name</b>              | C:\Documents and Settings\leletra1\Desktop\Old_Desktop\paper12\NMRs\Phch2ch2-alleny2_010001r |                               |                  | <b>Frequency (MHz)</b>      | 400.19               |
| <b>Nucleus</b>                | <sup>1</sup> H                                                                               | <b>Number of Transients</b>   | 16               | <b>Origin</b>               | spect                |
| <b>Owner</b>                  | nmsu                                                                                         | <b>Points Count</b>           | 32768            | <b>Pulse Sequence</b>       | zg30                 |
| <b>SW(cyclical) (Hz)</b>      | 8278.15                                                                                      | <b>Solvent</b>                | CHLOROFORM-d     | <b>Receiver Gain</b>        | 256.00               |
| <b>Sweep Width (Hz)</b>       | 8277.89                                                                                      | <b>Temperature (degree C)</b> | 27.000           | <b>Spectrum Offset (Hz)</b> | 2455.4819            |

<sup>1</sup>H NMR (400 MHz, CHLOROFORM-d) δ ppm 7.09 - 7.37 (m, 5 H), 5.28 (q, *J*=6.57 Hz, 1 H), 4.88 (dd, *J*=6.69, 2.40 Hz, 2 H), 4.12 - 4.25 (m, 1 H), 2.61 - 2.86 (m, 2 H), 1.82 - 2.00 (m, 2 H), 1.71 (br. s., 1 H)

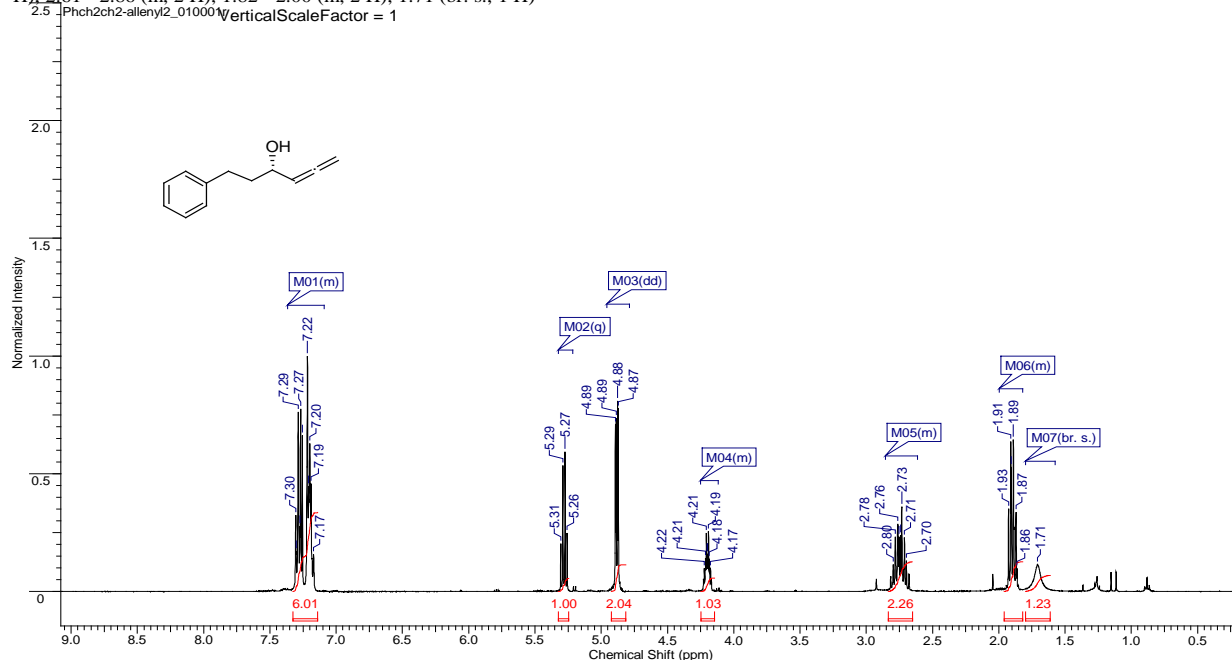

5/16/2012 11:03:52 PM

|                               |                                                                                              |                               |                  |                             |                      |
|-------------------------------|----------------------------------------------------------------------------------------------|-------------------------------|------------------|-----------------------------|----------------------|
| <b>Acquisition Time (sec)</b> | 1.3664                                                                                       | <b>Comment</b>                | Phch2ch2-alleny2 | <b>Date</b>                 | 28 Apr 2012 04:16:00 |
| <b>Date Stamp</b>             | 28 Apr 2012 04:16:00                                                                         |                               |                  |                             |                      |
| <b>File Name</b>              | C:\Documents and Settings\leletra1\Desktop\Old_Desktop\paper12\NMRs\Phch2ch2-alleny2_012001r |                               |                  | <b>Frequency (MHz)</b>      | 100.63               |
| <b>Nucleus</b>                | <sup>13</sup> C                                                                              | <b>Number of Transients</b>   | 2048             | <b>Origin</b>               | spect                |
| <b>Owner</b>                  | nmsu                                                                                         | <b>Points Count</b>           | 32768            | <b>Pulse Sequence</b>       | zgpg30               |
| <b>SW(cyclical) (Hz)</b>      | 23980.81                                                                                     | <b>Solvent</b>                | CHLOROFORM-d     | <b>Receiver Gain</b>        | 8192.00              |
| <b>Sweep Width (Hz)</b>       | 23980.08                                                                                     | <b>Temperature (degree C)</b> | 27.000           | <b>Spectrum Offset (Hz)</b> | 10062.3271           |

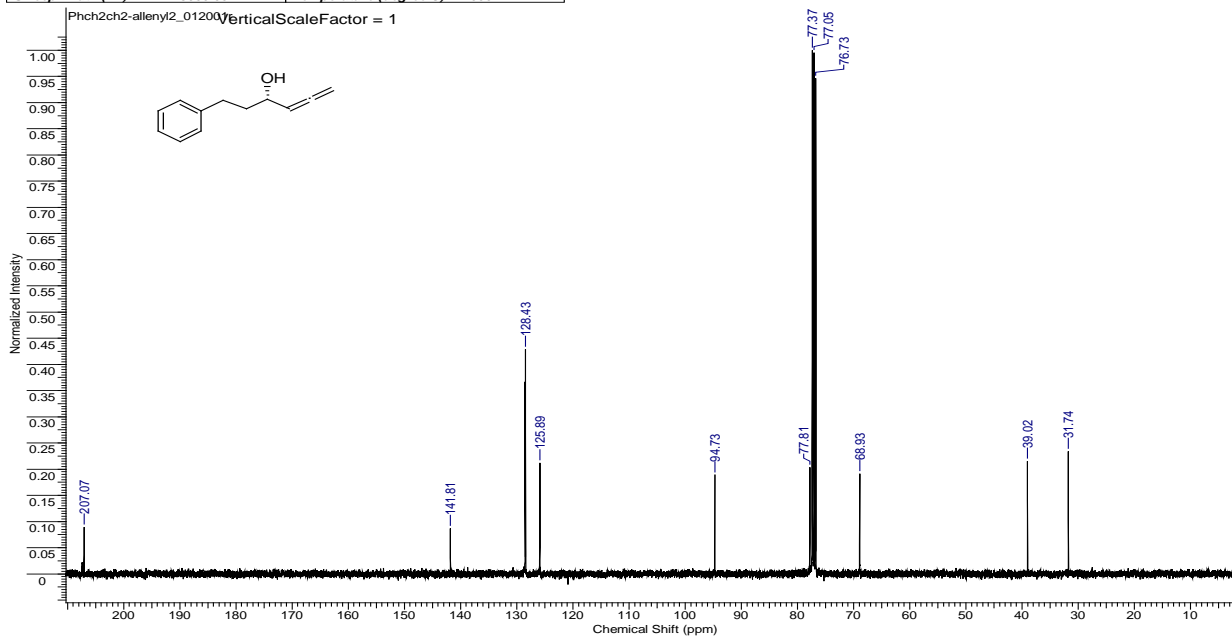

5/16/2012 11:30:04 PM

|                               |                                                                                          |                               |              |                             |                      |
|-------------------------------|------------------------------------------------------------------------------------------|-------------------------------|--------------|-----------------------------|----------------------|
| <b>Acquisition Time (sec)</b> | 3.9584                                                                                   | <b>Comment</b>                | Cy-allenyl-1 | <b>Date</b>                 | 04 May 2012 23:57:52 |
| <b>Date Stamp</b>             | 04 May 2012 23:57:52                                                                     |                               |              |                             |                      |
| <b>File Name</b>              | C:\Documents and Settings\leletra1\Desktop\Old_Desktop\paper12\NMRs\Cy-allenyl-1_010001r | <b>Frequency (MHz)</b>        | 400.19       |                             |                      |
| <b>Nucleus</b>                | 1H                                                                                       | <b>Number of Transients</b>   | 16           | <b>Origin</b>               | spect                |
| <b>Owner</b>                  | nmsu                                                                                     | <b>Points Count</b>           | 32768        | <b>Pulse Sequence</b>       | zg30                 |
| <b>SW(cyclical) (Hz)</b>      | 8278.15                                                                                  | <b>Solvent</b>                | CHLOROFORM-d | <b>Spectrum Offset (Hz)</b> | 2405.8555            |
| <b>Sweep Width (Hz)</b>       | 8277.89                                                                                  | <b>Temperature (degree C)</b> | 27.000       |                             |                      |

<sup>1</sup>H NMR (400 MHz, CHLOROFORM-d) δ ppm 5.09 (q, *J*=6.57 Hz, 1 H), 4.71 (dd, *J*=6.57, 2.27 Hz, 2 H), 3.72 - 3.86 (m, 1 H), 1.46 - 1.79 (m, 6 H), 1.23 - 1.40 (m, 1 H), 0.77 - 1.23 (m, 5 H)

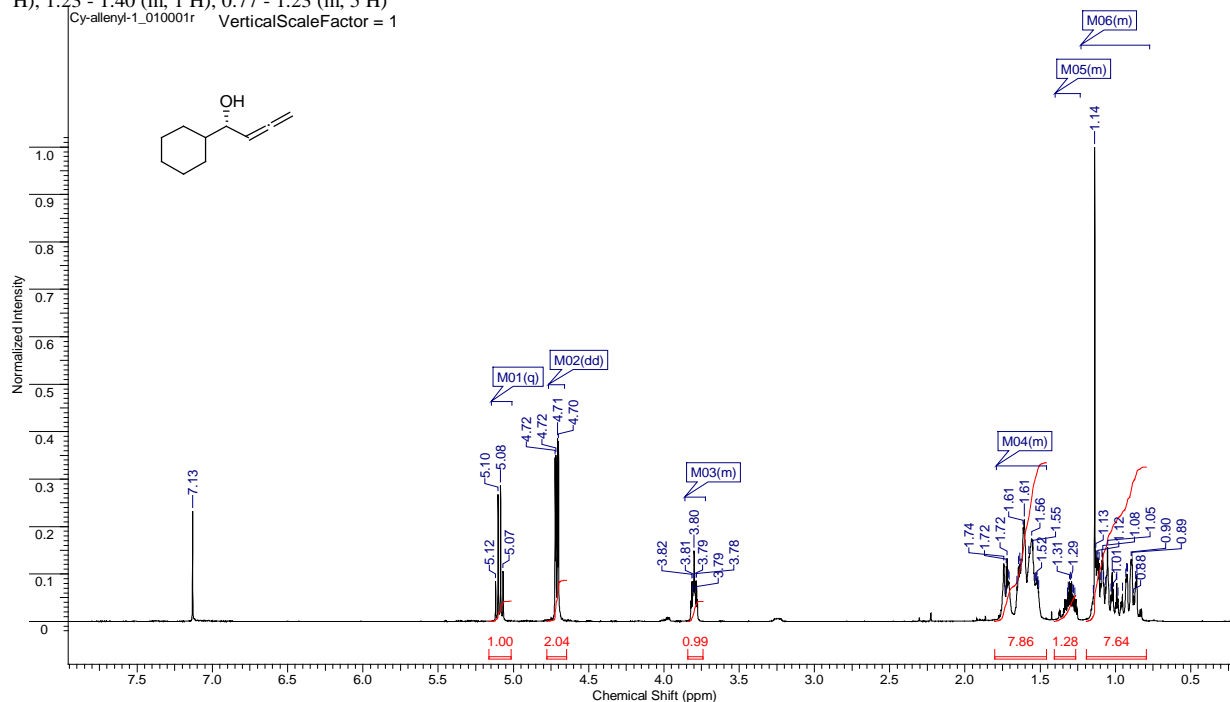

5/16/2012 11:34:32 PM

|                               |                                                                                          |                               |              |                             |                      |
|-------------------------------|------------------------------------------------------------------------------------------|-------------------------------|--------------|-----------------------------|----------------------|
| <b>Acquisition Time (sec)</b> | 1.3664                                                                                   | <b>Comment</b>                | Cy-allenyl-1 | <b>Date</b>                 | 05 May 2012 00:06:24 |
| <b>Date Stamp</b>             | 05 May 2012 00:06:24                                                                     |                               |              |                             |                      |
| <b>File Name</b>              | C:\Documents and Settings\leletra1\Desktop\Old_Desktop\paper12\NMRs\Cy-allenyl-1_011001r | <b>Frequency (MHz)</b>        | 100.63       |                             |                      |
| <b>Nucleus</b>                | 13C                                                                                      | <b>Number of Transients</b>   | 256          | <b>Origin</b>               | spect                |
| <b>Owner</b>                  | nmsu                                                                                     | <b>Points Count</b>           | 32768        | <b>Pulse Sequence</b>       | zgpg30               |
| <b>SW(cyclical) (Hz)</b>      | 23980.81                                                                                 | <b>Solvent</b>                | CHLOROFORM-d | <b>Spectrum Offset (Hz)</b> | 11045.6777           |
| <b>Sweep Width (Hz)</b>       | 23980.08                                                                                 | <b>Temperature (degree C)</b> | 27.000       |                             |                      |

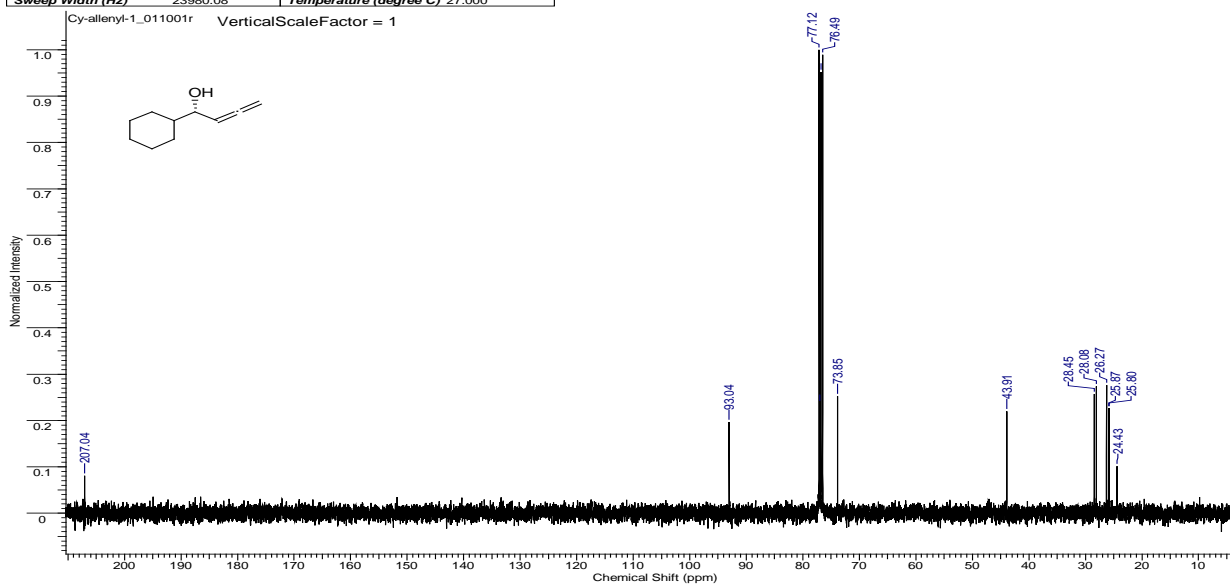

Supplement: c2cc34371a.pdf [file c2cc34371a.pdf]
